# Supplementary material for: Exploring the Antitubercular Activity of Anthranilic Acid Derivatives: From MabA (FabG1) Inhibition to Intrabacterial Acidification
Source: MDPI journal article supplement (doi:10.3390/ph16030335), 2023-02-22
Supplement: s1 [file s1]

## Supplementary materials

### Exploring the antitubercular activity of anthranilic acid derivatives: from MabA (FabG1) inhibition to intrabacterial acidification

Léo Faïon <sup>1,†</sup>, Kamel Djaout <sup>2,†</sup>, Catalin Pintiala <sup>1</sup>, Catherine Piveteau <sup>1</sup>, Florence Leroux <sup>1</sup>, Alexandre Biela <sup>1</sup>, Stéphanie Slupek <sup>2</sup>, Rudy Antoine <sup>2</sup>, Monika Záhorská <sup>3</sup>, Francois-Xavier Cantrelle <sup>4,5</sup>, Xavier Hanoulle <sup>4,5</sup>, Jana Korduláková <sup>3</sup>, Benoit Deprez <sup>1</sup>, Nicolas Willand <sup>1</sup>, Alain R. Baulard <sup>2,\*</sup>, Marion Flipo <sup>1,\*</sup>

<sup>1</sup> Univ. Lille, Inserm, Institut Pasteur de Lille, U1177 - Drugs and Molecules for living Systems, F-59000 Lille, France

<sup>2</sup> Univ. Lille, CNRS, Inserm, CHU Lille, Institut Pasteur de Lille, U1019 - UMR 9017 - CIIL - Center for Infection and Immunity of Lille, F-59000 Lille, France

<sup>3</sup> Department of Biochemistry, Faculty of Natural Sciences, Comenius University in Bratislava, Mlynská Dolina, Ilkovičova 6, 842 15 Bratislava, Slovakia

<sup>4</sup> Univ. Lille, Inserm, CHU Lille, Institut Pasteur de Lille, U1167 - RID-AGE - Risk Factors and Molecular Determinants of Aging-Related Diseases, F-59000 Lille, France

<sup>5</sup> CNRS, ERL9002 - Integrative Structural Biology, F-59000 Lille, France

\* Correspondence: alain.baulard@inserm.fr (A.R.B.); marion.flipo@univ-lille.fr (M.F.)

† These authors contributed equally to this work.

Figure S1: 1D <sup>19</sup>F NMR spectra of 4 compounds alone and in the presence of MabA

Figure S2: Western blot showing overexpression of MabA in H37Rv\_pMV261-MabA, as compared to the parental control.

Figures S3-S40: <sup>1</sup>H NMR, <sup>13</sup>C NMR and HRMS data of compounds **2-20**

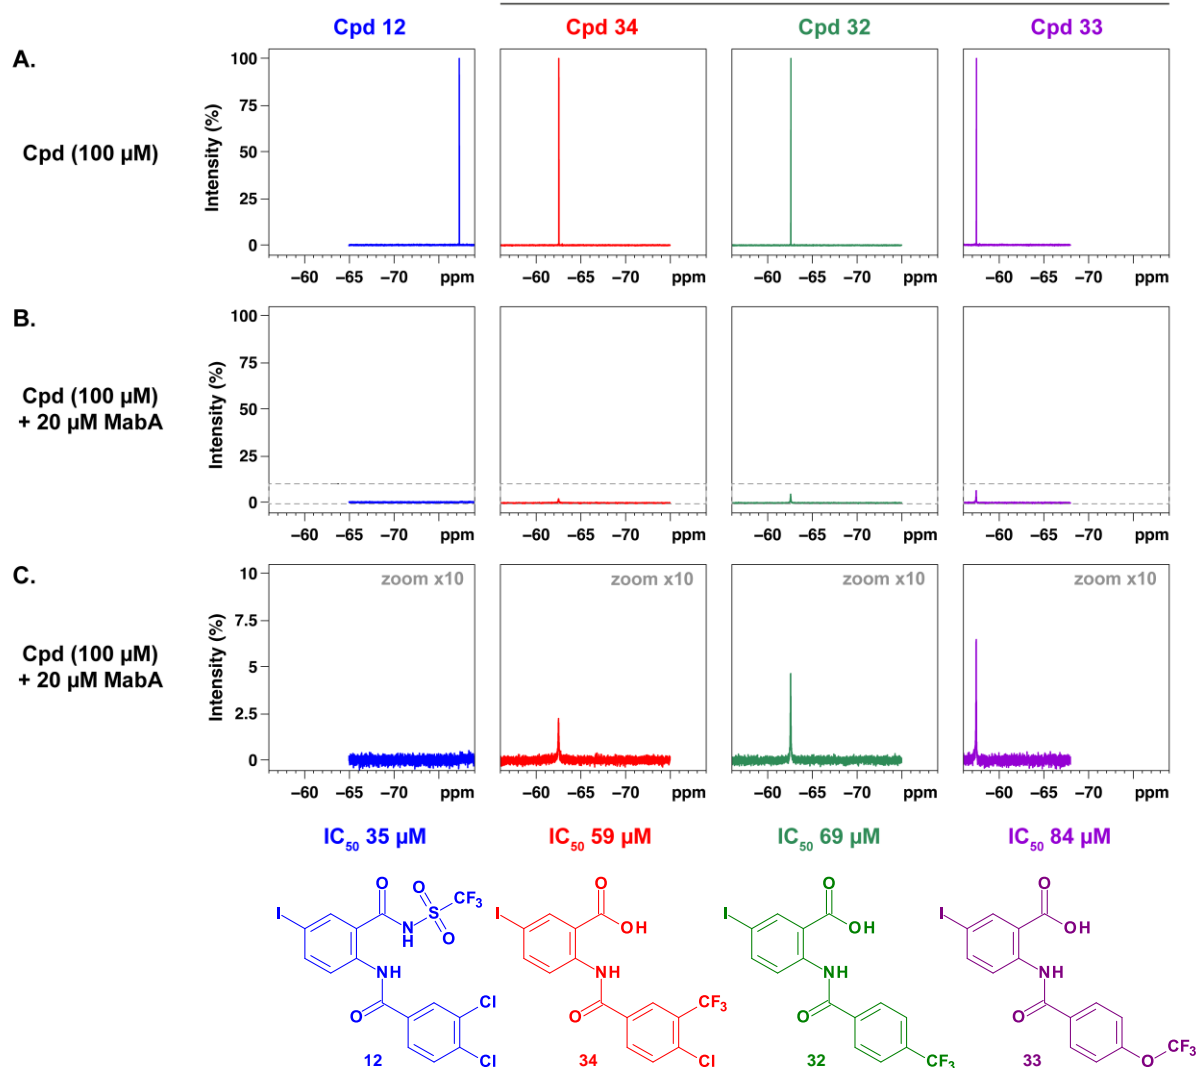

Figure S1: 1D  $^{19}\text{F}$  NMR spectra of compound **12** (this study) and compounds **34**, **32** and **33** from Faion L. *et al.* [20] (in blue, red, green and violet, respectively) at 100  $\mu\text{M}$  alone (**A.**) and in the presence of MabA at 20  $\mu\text{M}$  (**B.** and **C.**). The spectra in **C.** correspond to the ones in **B.** with a 10x magnification of the y-axis. The  $IC_{50}$  for each compound is indicated at the bottom.

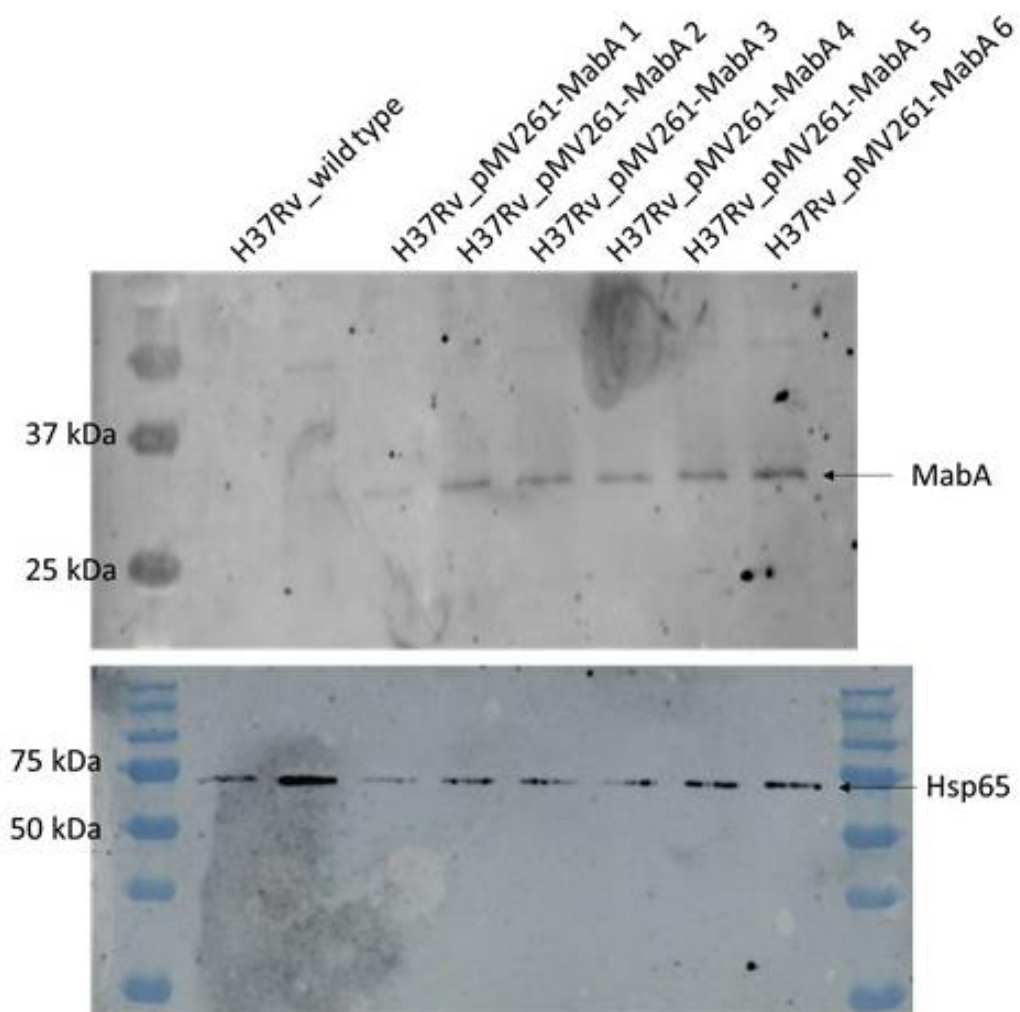

Figure S2: Western blot showing overexpression of MabA in H37Rv\_pMV261-MabA, as compared to the parental control. H37Rv\_pMV261-MabA 1 through 6 correspond to different clones tested.

<sup>1</sup>H NMR of compound 2 (300 MHz, DMSO-d6)

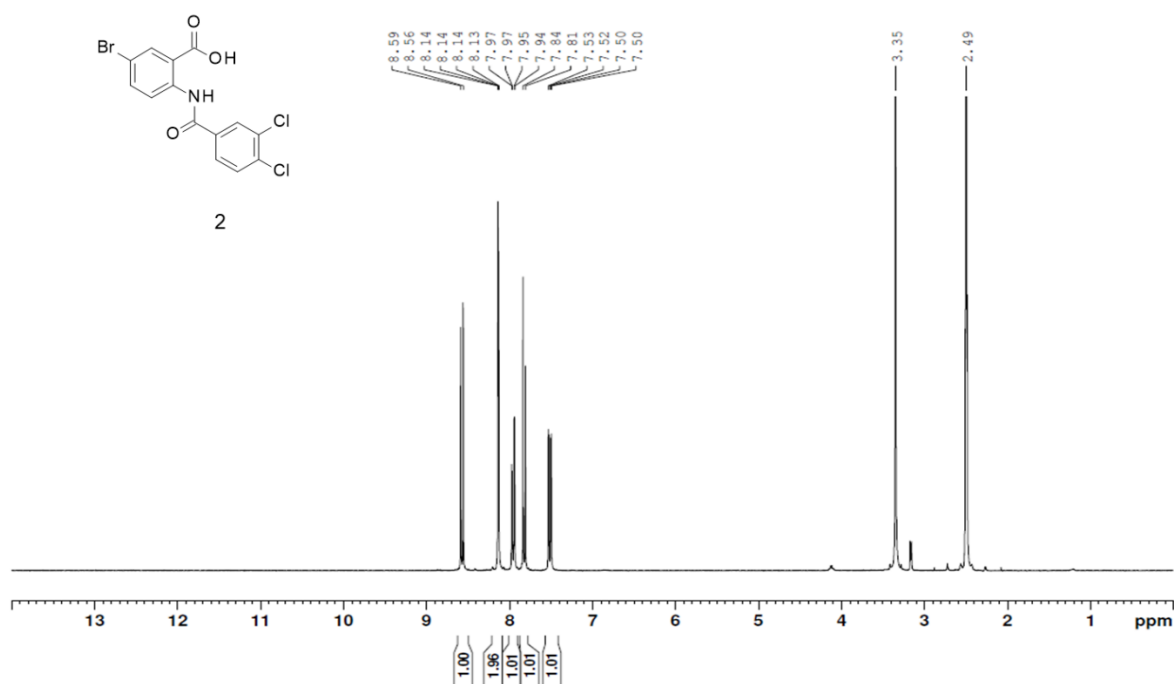

<sup>13</sup>C NMR of compound 2 (75 MHz, DMSO-d6)

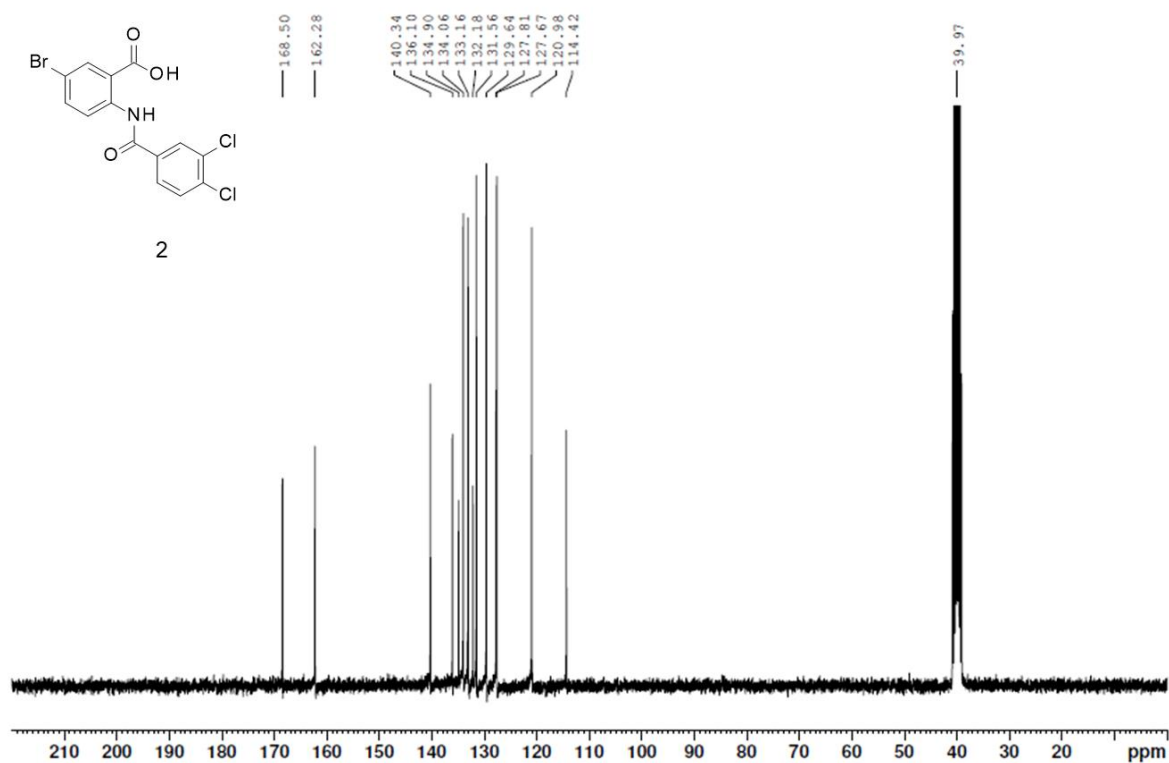

Figure S3: <sup>1</sup>H NMR and <sup>13</sup>C NMR spectra of compound 2

## Elemental Composition Report

### Single Mass Analysis

Tolerance = 100.0 mDa / DBE: min = -1.5, max = 500.0

Element prediction: Off

Number of isotope peaks used for i-FIT = 3

Monoisotopic Mass, Even Electron Ions

337 formula(e) evaluated with 55 results within limits (up to 10 best isotopic matches for each mass)

Elements Used:

C: 0-30 H: 0-40 N: 0-4 O: 0-6 Cl: 0-2 Br: 1-1

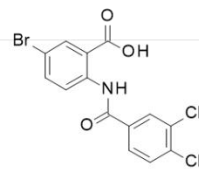

2

Page 1

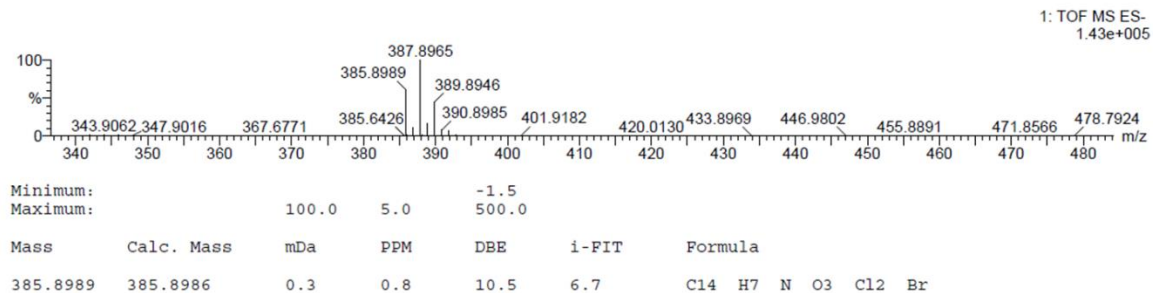

Figure S4: HRMS spectrum of compound 2

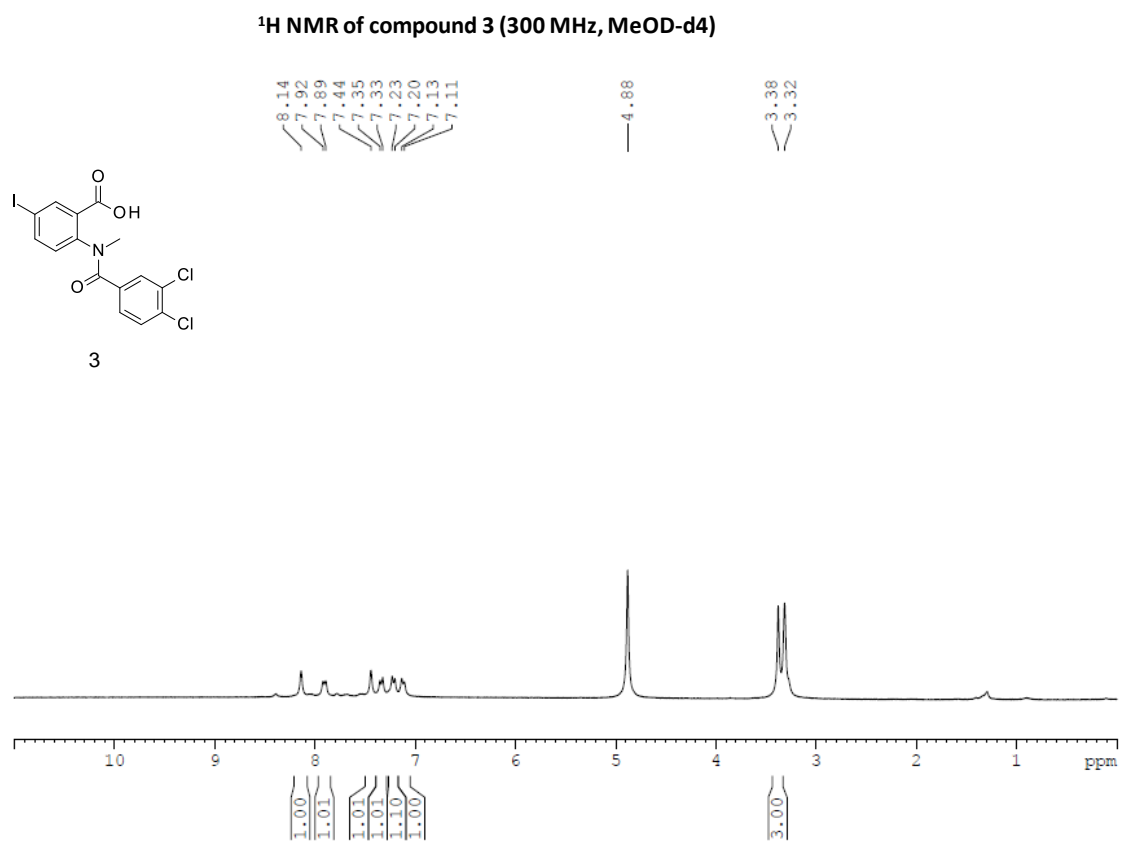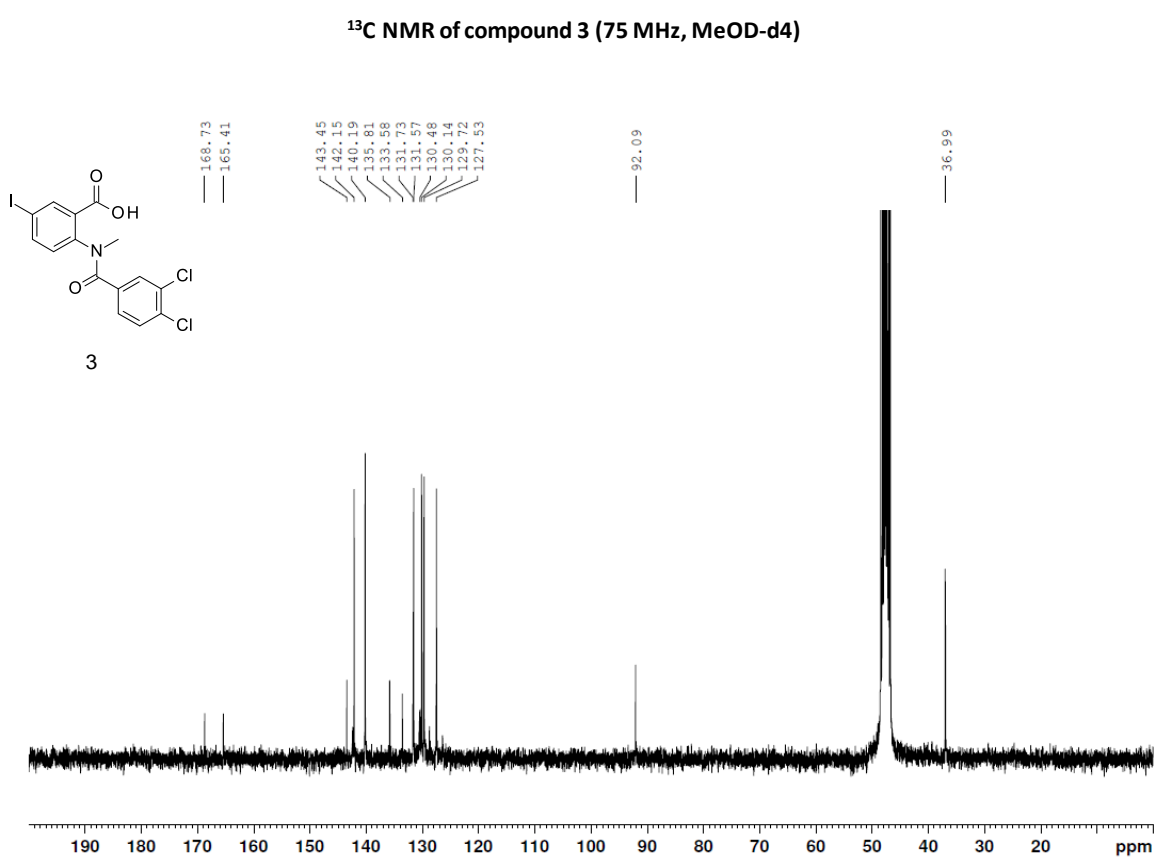

Figure S5: <sup>1</sup>H NMR and <sup>13</sup>C NMR spectra of compound 3

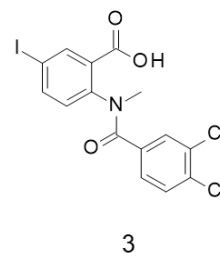

## Elemental Composition Report

### Single Mass Analysis

Tolerance = 20.0 PPM / DBE: min = -1.5, max = 80.0

Element prediction: Off

Number of isotope peaks used for i-FIT = 2

Monoisotopic Mass, Even Electron Ions

768 formula(e) evaluated with 11 results within limits (up to 1 best isotopic matches for each mass)

Elements Used:

C: 6-40 H: 2-36 N: 0-5 O: 0-7 Cl: 1-3 I: 0-1

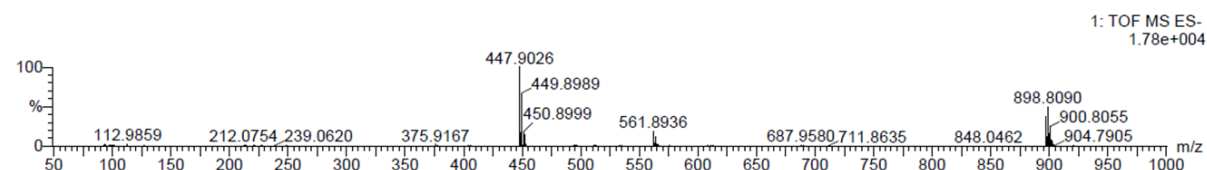

| Minimum: |            |      |      | -1.5 |       |                   |
|----------|------------|------|------|------|-------|-------------------|
| Maximum: |            | 10.0 | 20.0 | 80.0 |       |                   |
| Mass     | Calc. Mass | mDa  | PPM  | DBE  | i-FIT | Formula           |
| 447.9026 | 447.9004   | 2.2  | 4.9  | 10.5 | 2.1   | C15 H9 N O3 Cl2 I |

Figure S6: HRMS spectrum of compound 3

<sup>1</sup>H NMR of compound 4 (300 MHz, DMSO-d6)

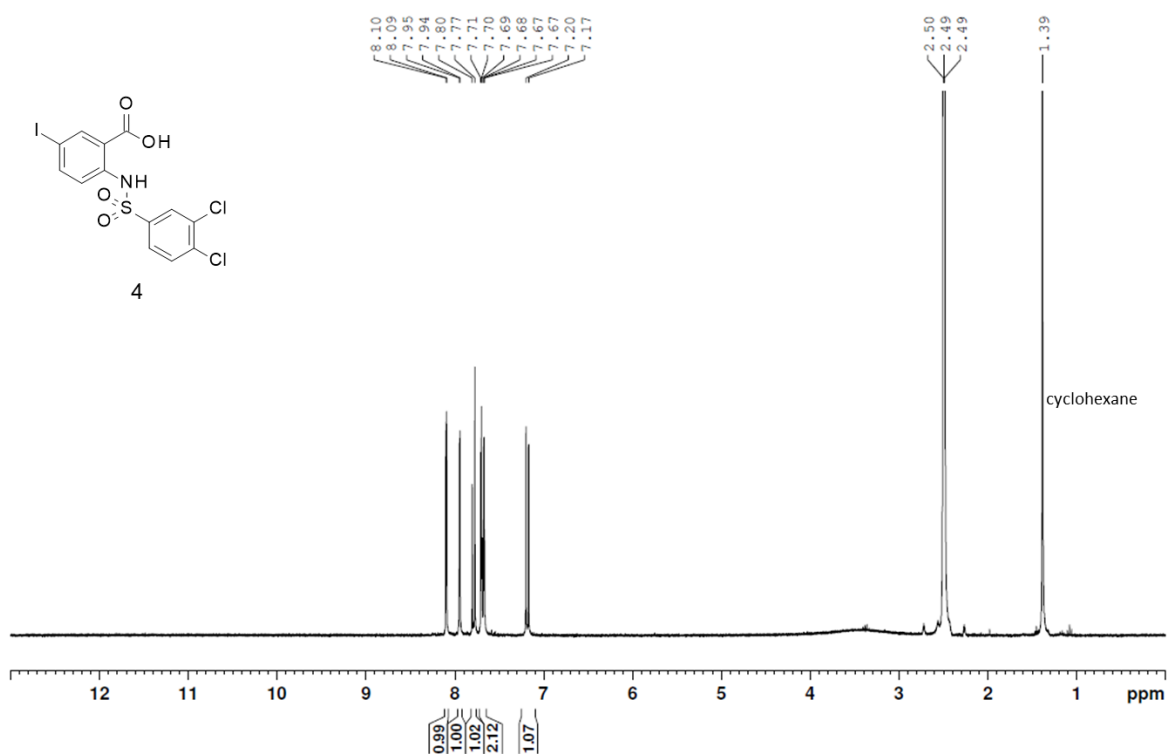

<sup>13</sup>C NMR of compound 4 (75 MHz, DMSO-d6)

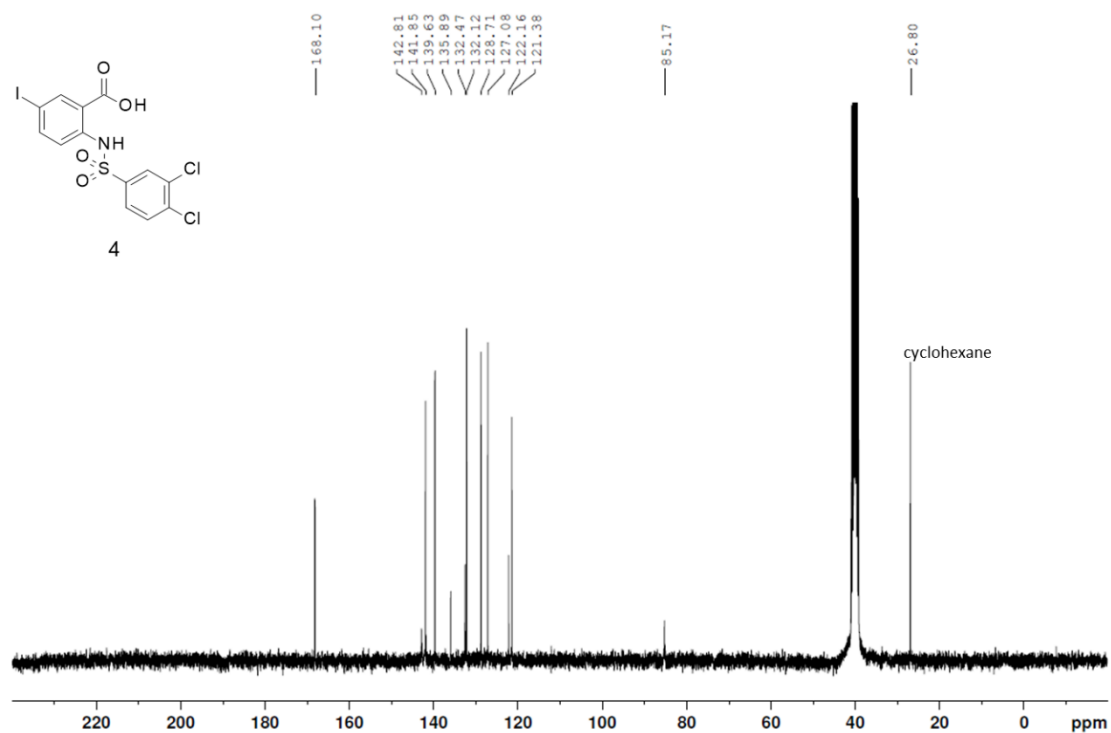

Figure S7: <sup>1</sup>H NMR and <sup>13</sup>C NMR spectra of compound 4



## Elemental Composition Report

### Single Mass Analysis

Tolerance = 10.0 PPM / DBE: min = -1.5, max = 50.0

Element prediction: Off

Number of isotope peaks used for i-FIT = 3

Monoisotopic Mass, Even Electron Ions

56 formula(e) evaluated with 1 results within limits (all results (up to 1000) for each mass)

Elements Used:

C: 1-17 H: 1-17 N: 1-2 O: 0-4 S: 1-1 Cl: 0-2 I: 0-1

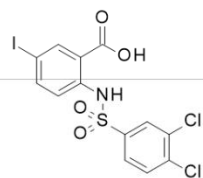

4

Page 1

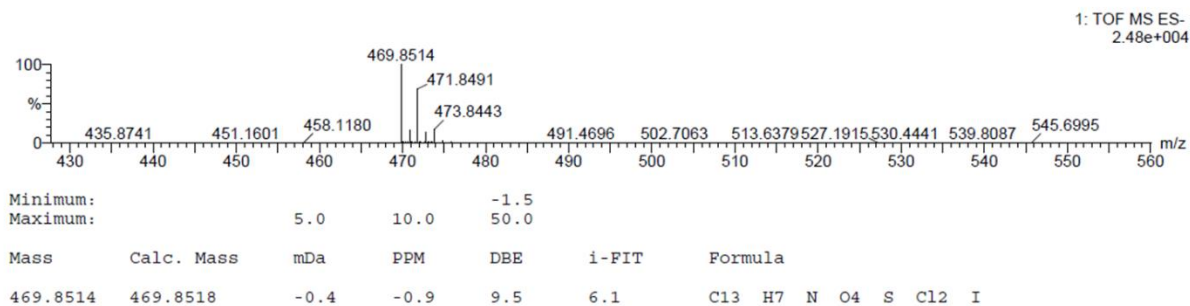

Figure S8: HRMS spectrum of compound 4

<sup>1</sup>H NMR of compound 5 (300 MHz, DMSO-d6)

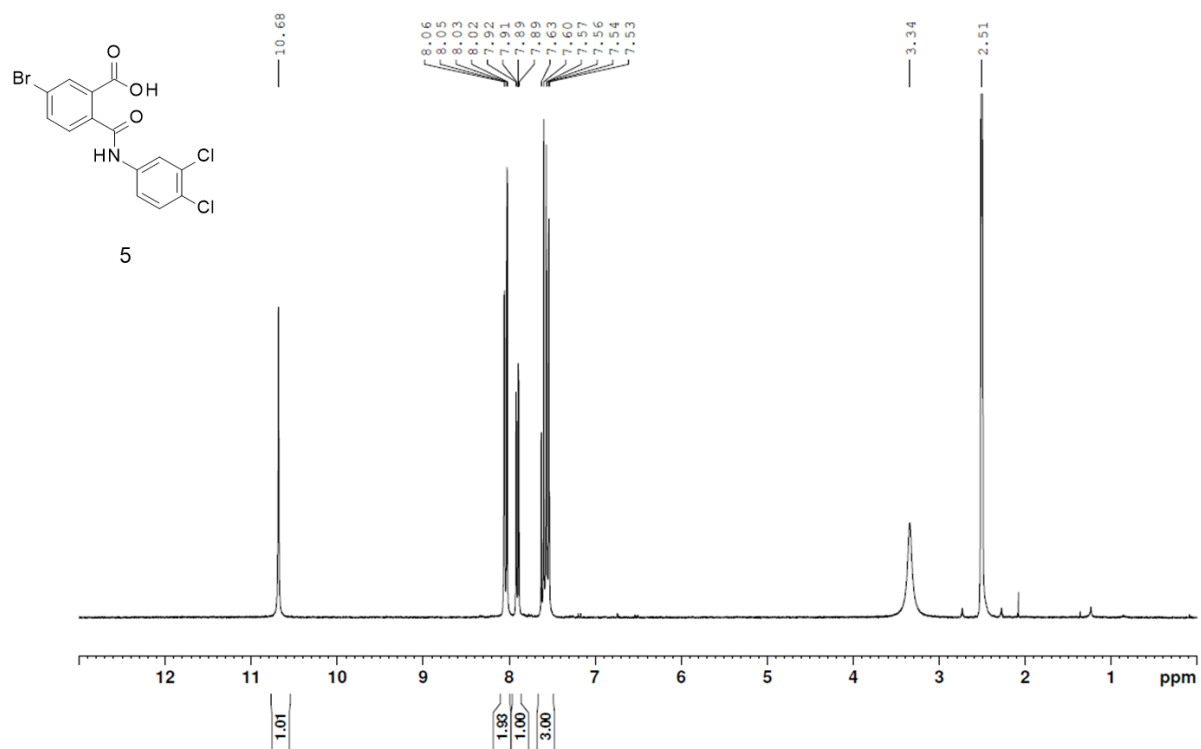

<sup>13</sup>C NMR of compound 5 (75 MHz, DMSO-d6)

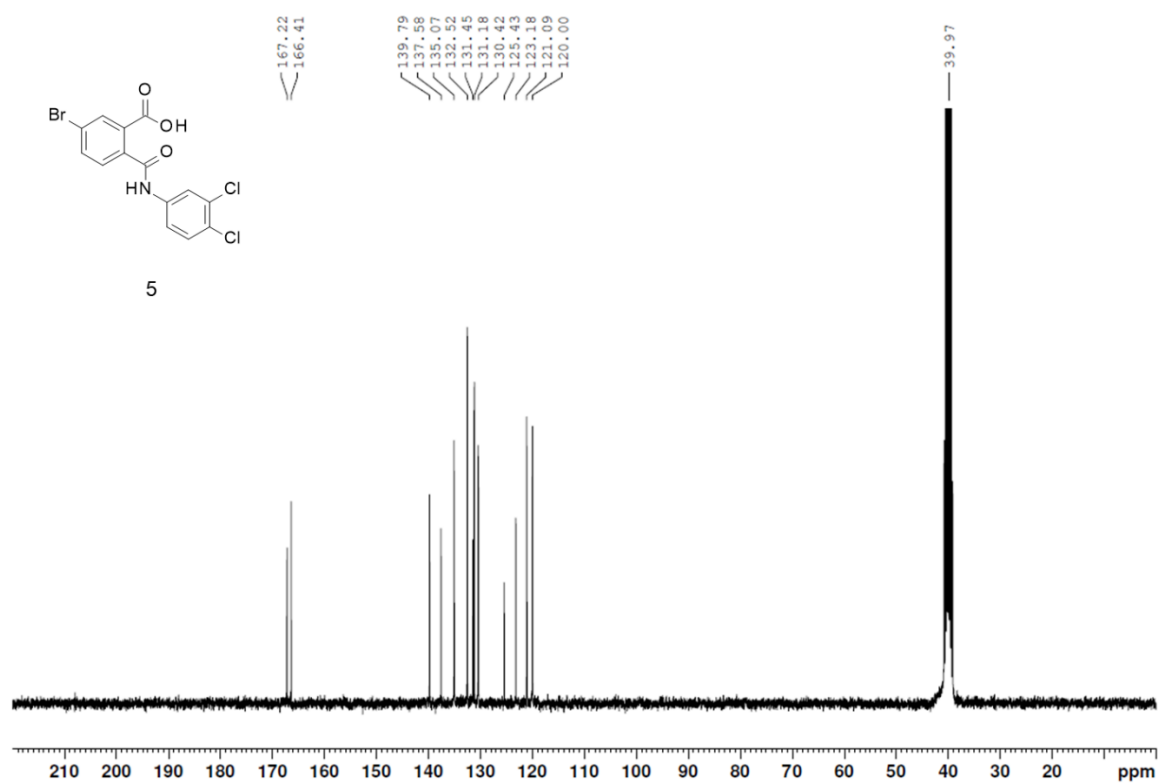

Figure S9: <sup>1</sup>H NMR and <sup>13</sup>C NMR spectra of compound 5

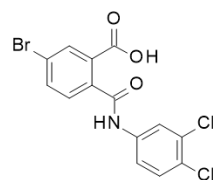

5

## Elemental Composition Report

Page 1

### Single Mass Analysis

Tolerance = 20.0 PPM / DBE: min = -1.5, max = 50.0

Element prediction: Off

Number of isotope peaks used for i-FIT = 2

Monoisotopic Mass, Even Electron Ions

335 formula(e) evaluated with 7 results within limits (up to 1 best isotopic matches for each mass)

Elements Used:

C: 2-20 H: 2-36 N: 0-5 O: 0-7 Cl: 1-2 Br: 1-1 I: 0-1

1: TOF MS ES-  
5.24e+003

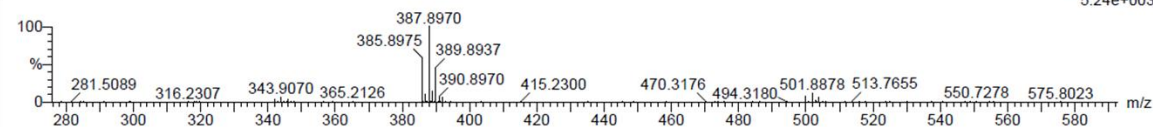

Minimum:  
Maximum:

10.0 20.0 -1.5 50.0

| Mass     | Calc. Mass | mDa  | PPM  | DBE  | i-FIT | Formula            |
|----------|------------|------|------|------|-------|--------------------|
| 385.8975 | 385.8986   | -1.1 | -2.9 | 10.5 | 0.2   | C14 H7 N O3 Cl2 Br |

Figure S10: HRMS spectrum of compound 5

<sup>1</sup>H NMR of compound 6 (300 MHz, DMSO-d<sub>6</sub>)

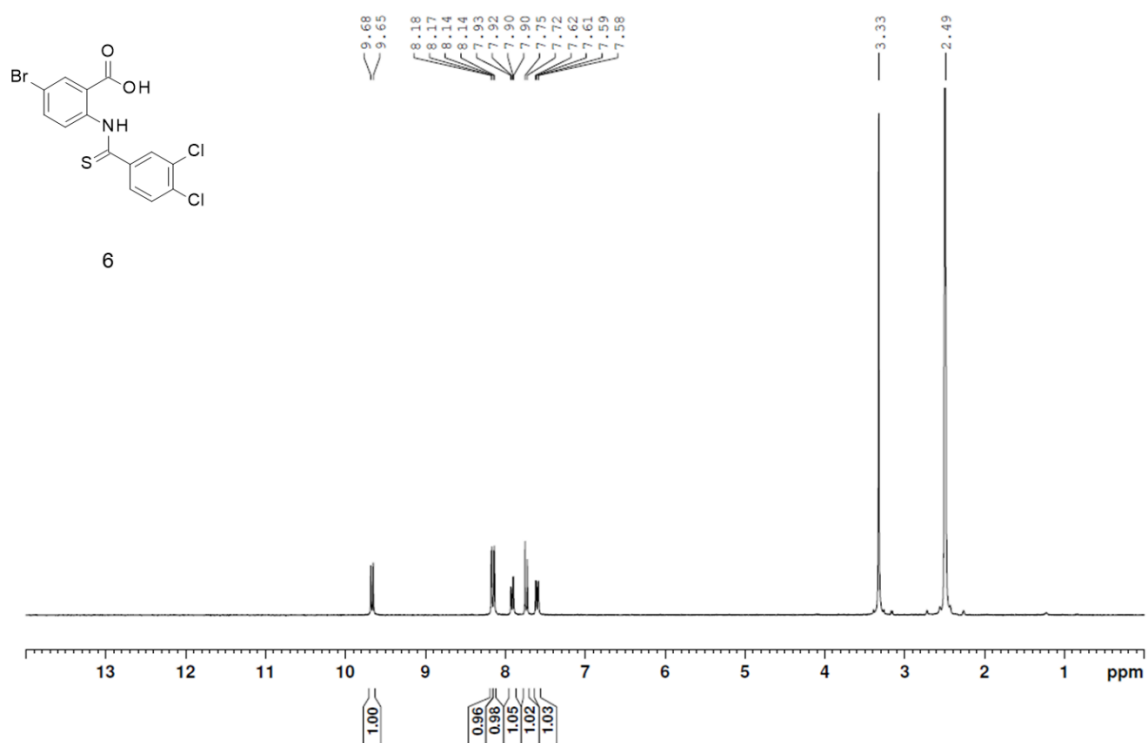

<sup>13</sup>C NMR of compound 6 (75 MHz, DMSO-d<sub>6</sub>)

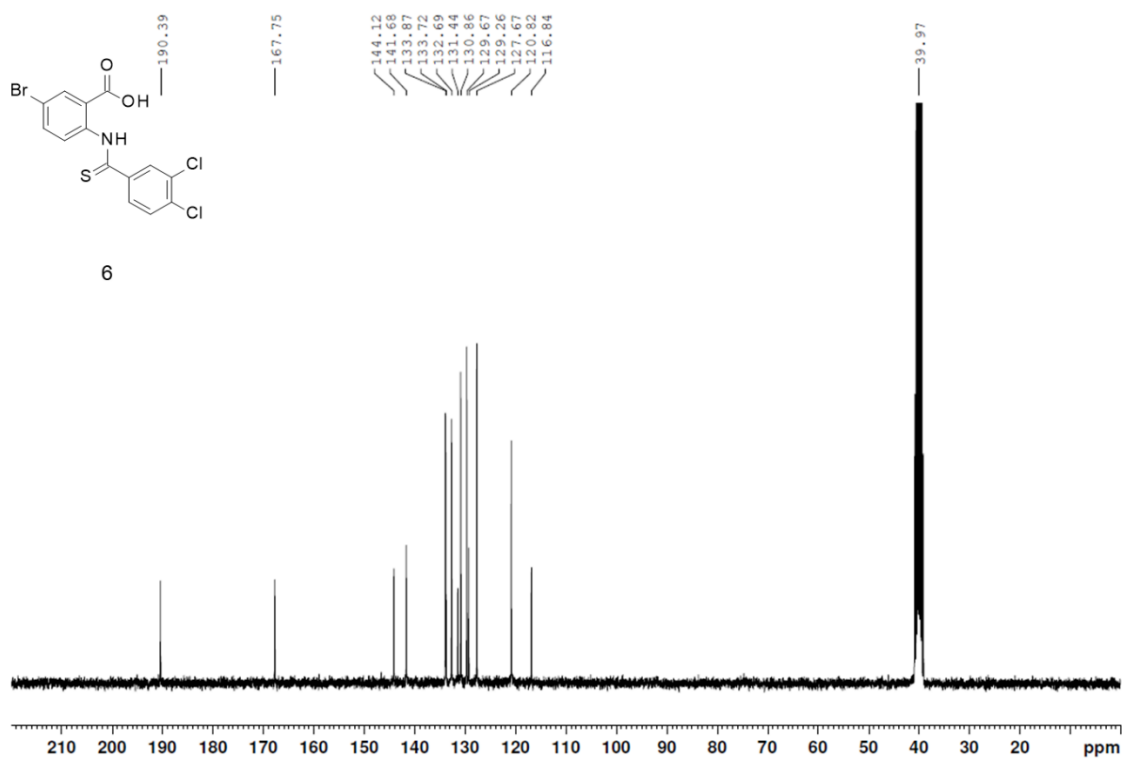

Figure S11: <sup>1</sup>H NMR and <sup>13</sup>C NMR spectra of compound 6

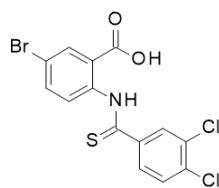

6

## Elemental Composition Report

Page 1

### Single Mass Analysis

Tolerance = 20.0 PPM / DBE: min = -1.5, max = 50.0

Element prediction: Off

Number of isotope peaks used for i-FIT = 2

Monoisotopic Mass, Even Electron Ions

489 formula(e) evaluated with 16 results within limits (up to 1 best isotopic matches for each mass)

Elements Used:

C: 2-20 H: 2-36 N: 0-5 O: 0-7 S: 0-1 Cl: 1-2 Br: 1-1

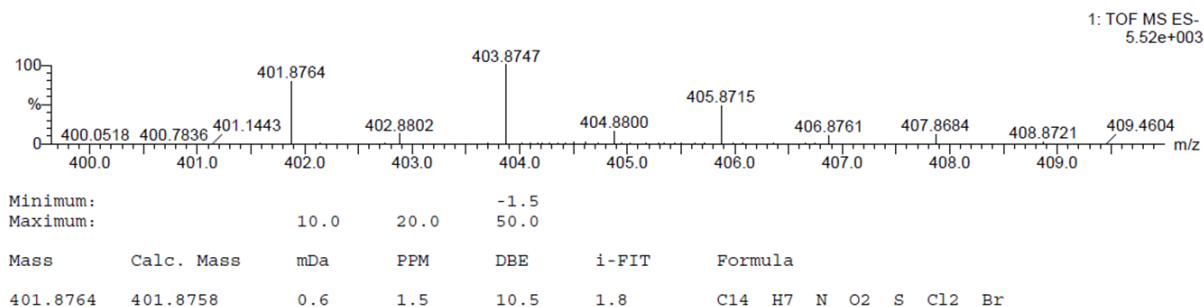

Figure S12: HRMS spectrum of compound 6

**<sup>1</sup>H NMR of compound 7 (300 MHz, DMSO-d<sub>6</sub>)**

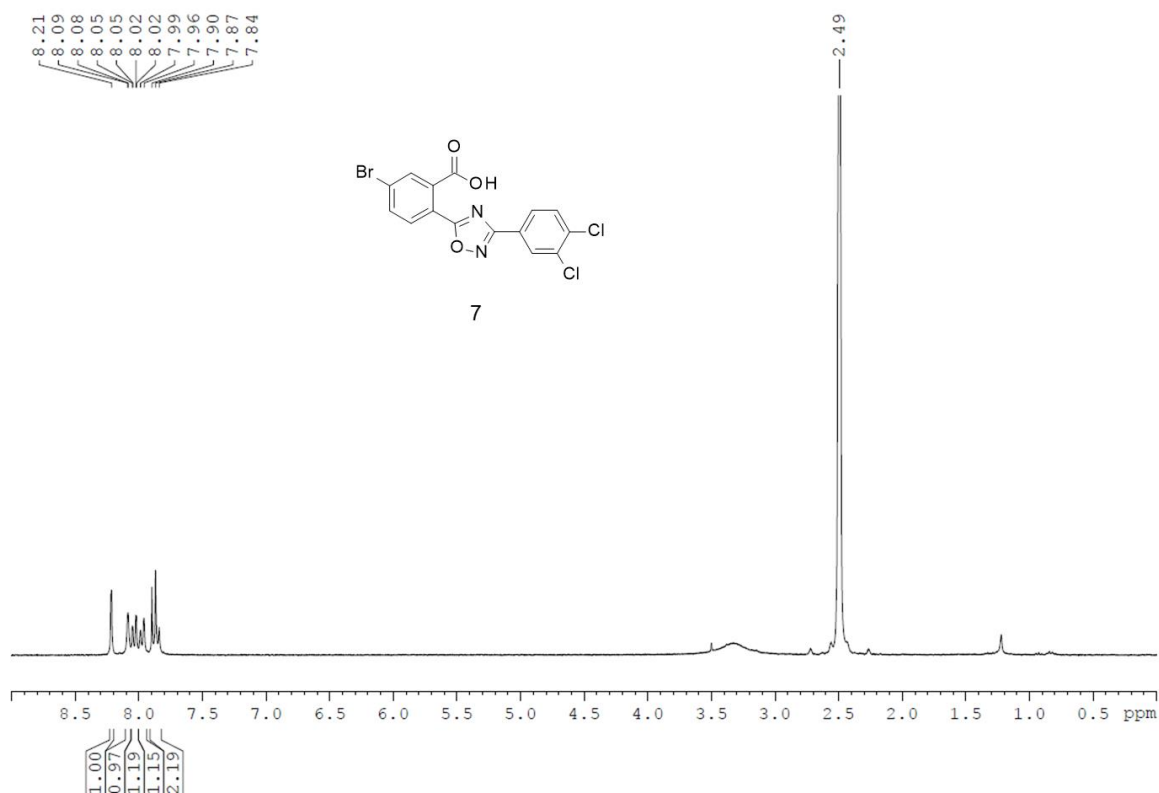

**<sup>13</sup>C NMR of compound 7 (75 MHz, DMSO-d<sub>6</sub>)**

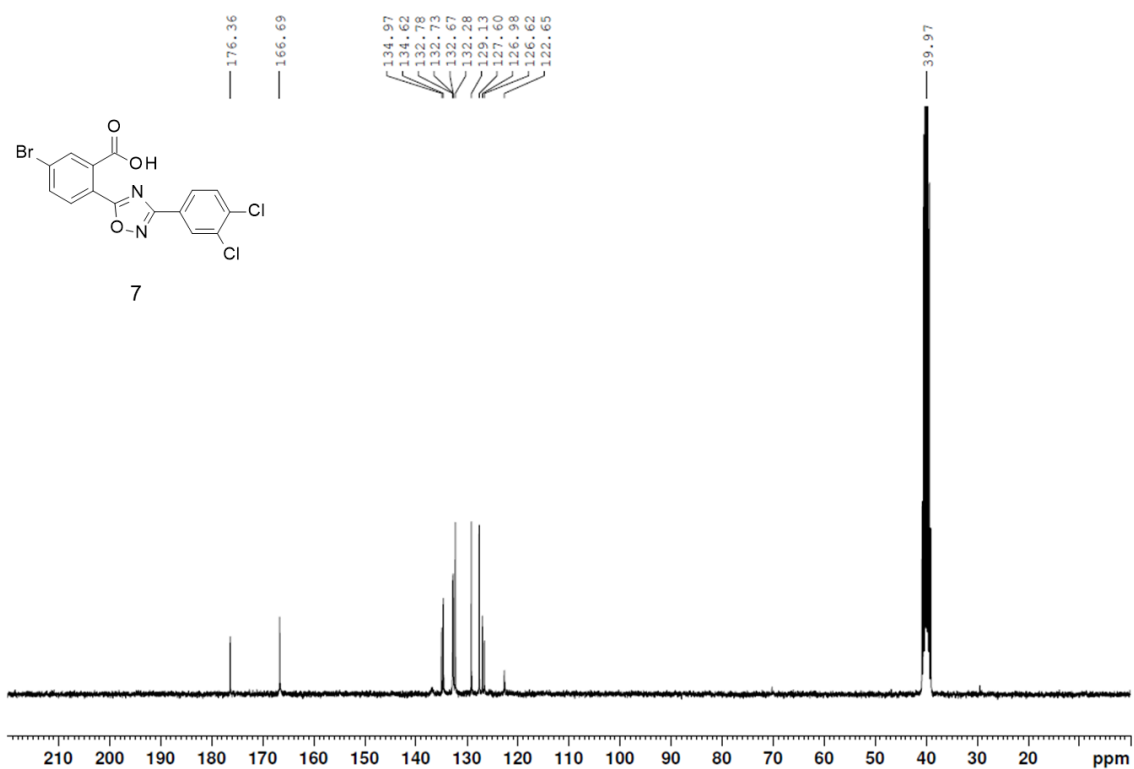

Figure S13: <sup>1</sup>H NMR and <sup>13</sup>C NMR spectra of compound 7

## Elemental Composition Report

### Single Mass Analysis

Tolerance = 100.0 mDa / DBE: min = -1.5, max = 500.0

Element prediction: Off

Number of isotope peaks used for i-FIT = 3

Monoisotopic Mass, Even Electron Ions

562 formula(e) evaluated with 159 results within limits (up to 10 best isotopic matches for each mass)

Elements Used:

C: 0-30 H: 0-40 N: 0-4 O: 0-6 Cl: 0-2 Br: 1-1 I: 0-1

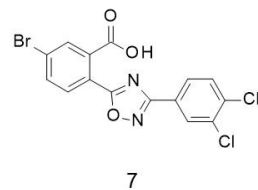

Page 1

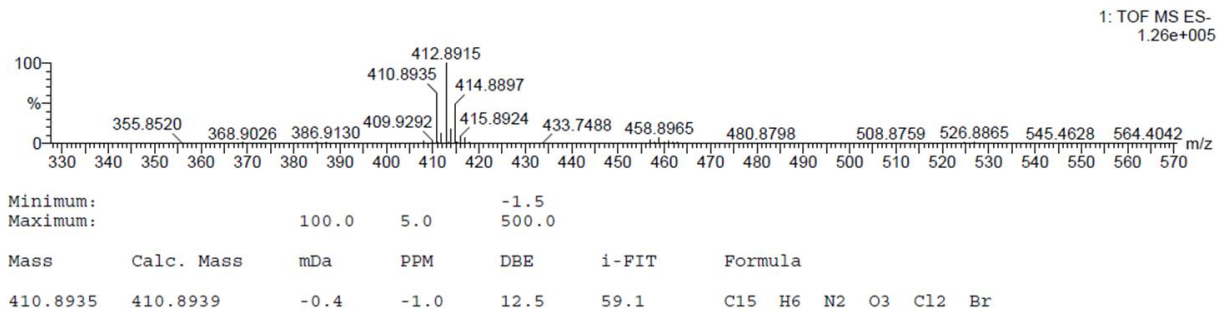

Figure S14: HRMS spectrum of compound 7

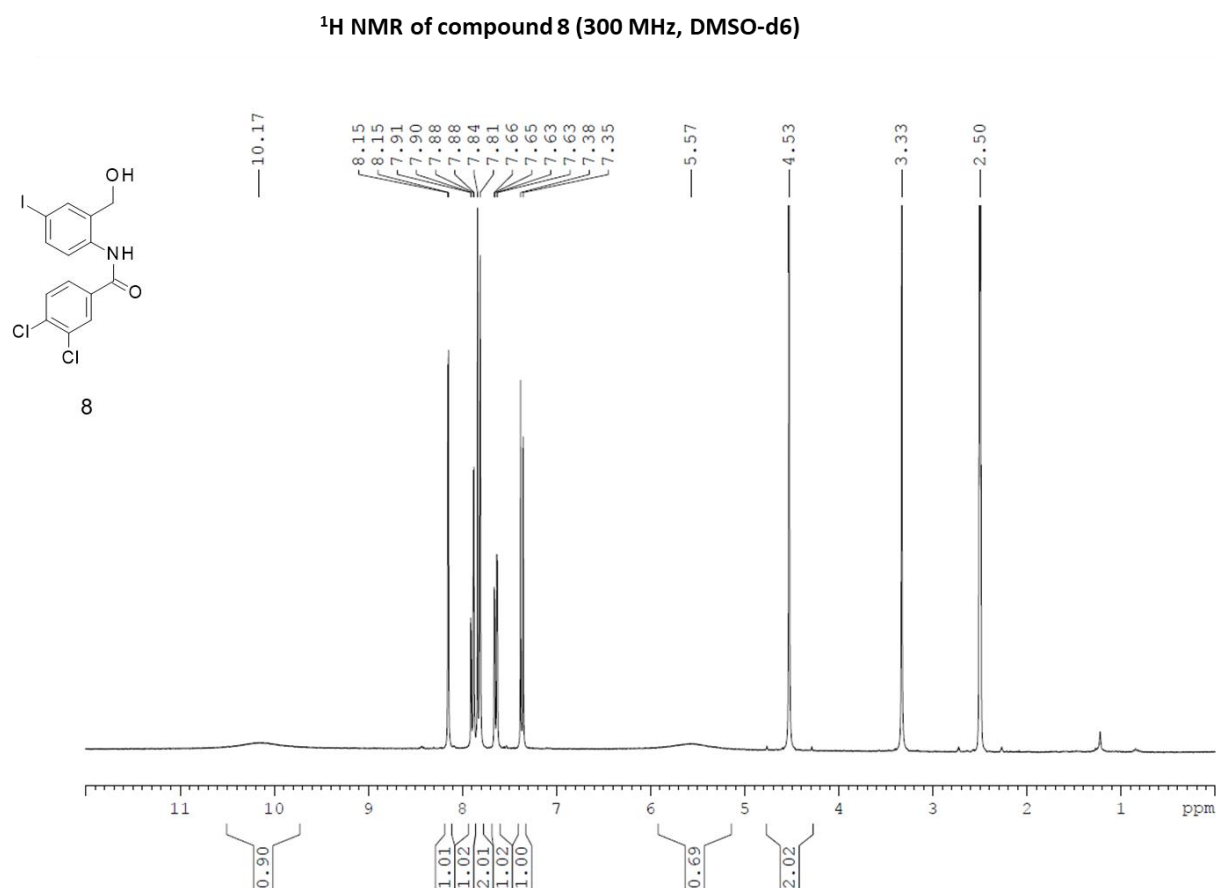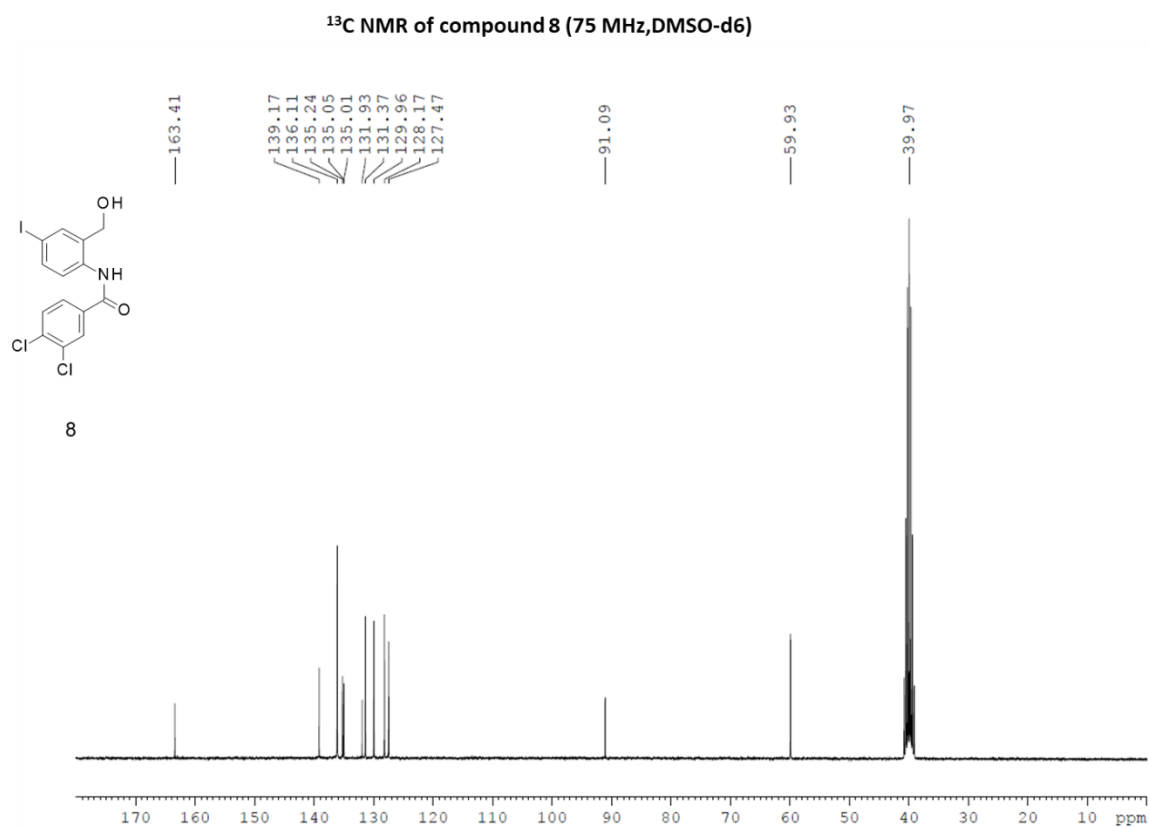

Figure S15: <sup>1</sup>H NMR and <sup>13</sup>C NMR spectra of compound 8



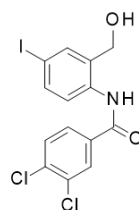

## Elemental Composition Report

Page 1

### Single Mass Analysis

Tolerance = 20.0 PPM / DBE: min = -1.5, max = 50.0

Element prediction: Off

Number of isotope peaks used for i-FIT = 2

8

Monoisotopic Mass, Even Electron Ions

391 formula(e) evaluated with 10 results within limits (up to 1 best isotopic matches for each mass)

Elements Used:

C: 2-20 H: 2-36 N: 0-5 O: 0-7 Cl: 1-2 I: 0-1

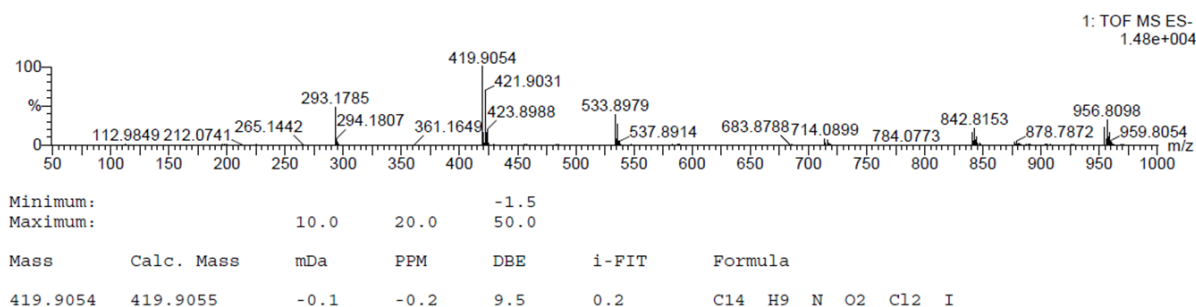

Figure S16: HRMS spectrum of compound 8

<sup>1</sup>H NMR of compound 9 (300 MHz, DMSO-d<sub>6</sub>)

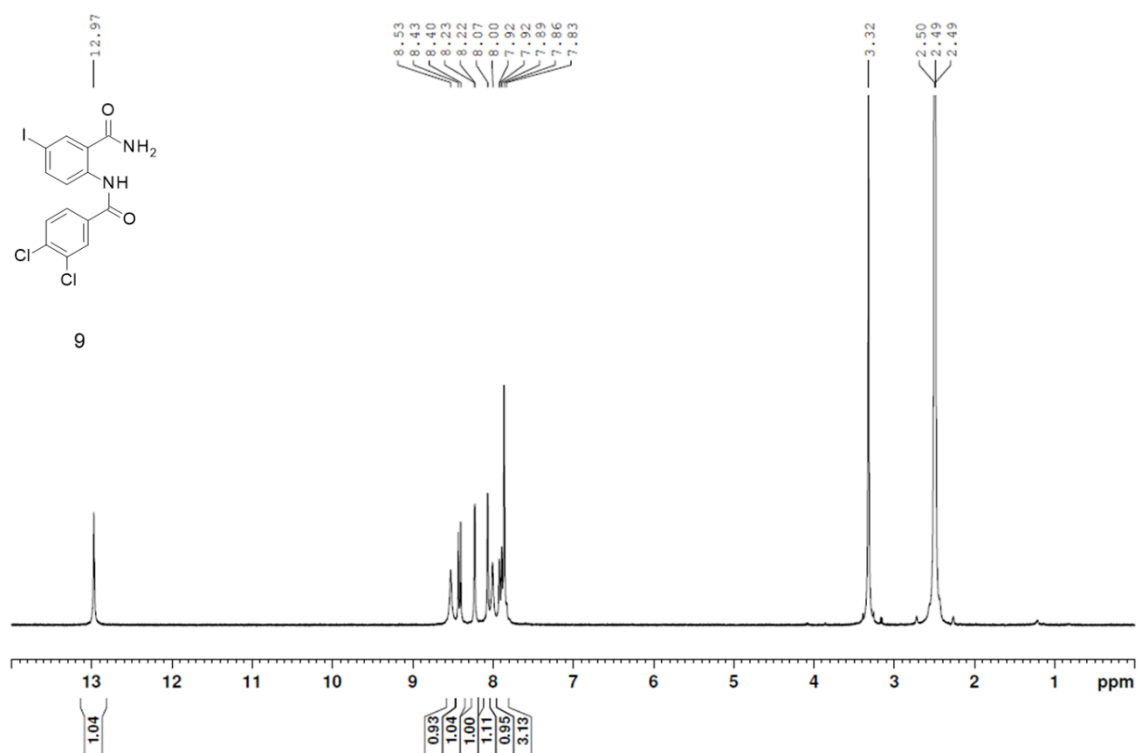

<sup>13</sup>C NMR of compound 9 (75 MHz, DMSO-d<sub>6</sub>)

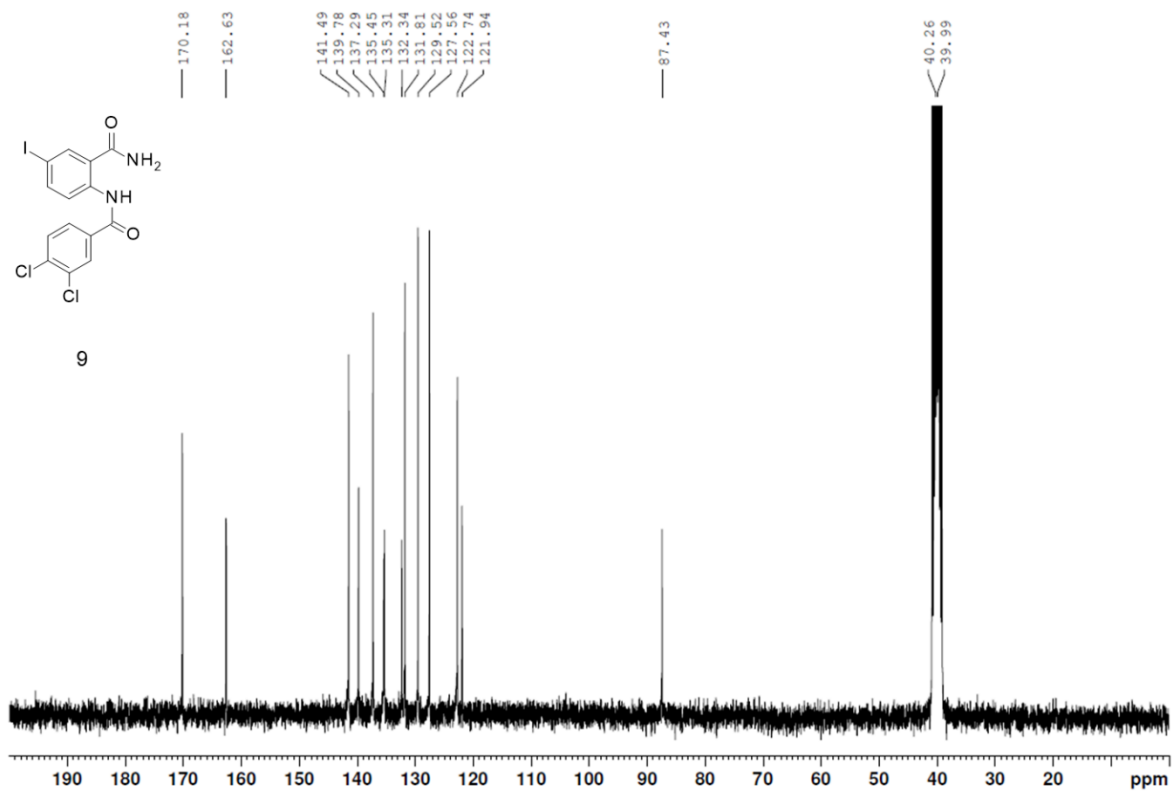

Figure S17: <sup>1</sup>H NMR and <sup>13</sup>C NMR spectra of compound 9

## Elemental Composition Report

### Single Mass Analysis

Tolerance = 20.0 PPM / DBE: min = -1.5, max = 80.0

Element prediction: Off

Number of isotope peaks used for i-FIT = 2

Monoisotopic Mass, Even Electron Ions

635 formula(e) evaluated with 12 results within limits (up to 1 closest results for each mass)

Elements Used:

C: 6-40 H: 2-36 N: 0-4 O: 0-7 Cl: 1-3 I: 0-1

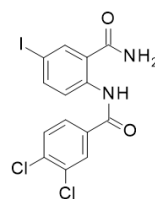

9

Page 1

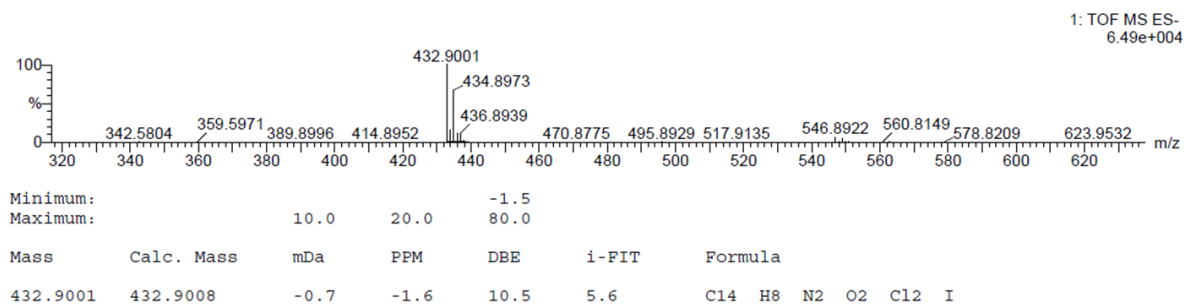

Figure S18: HRMS spectrum of compound 9

<sup>1</sup>H NMR of compound 10 (300 MHz, DMSO-d<sub>6</sub>)

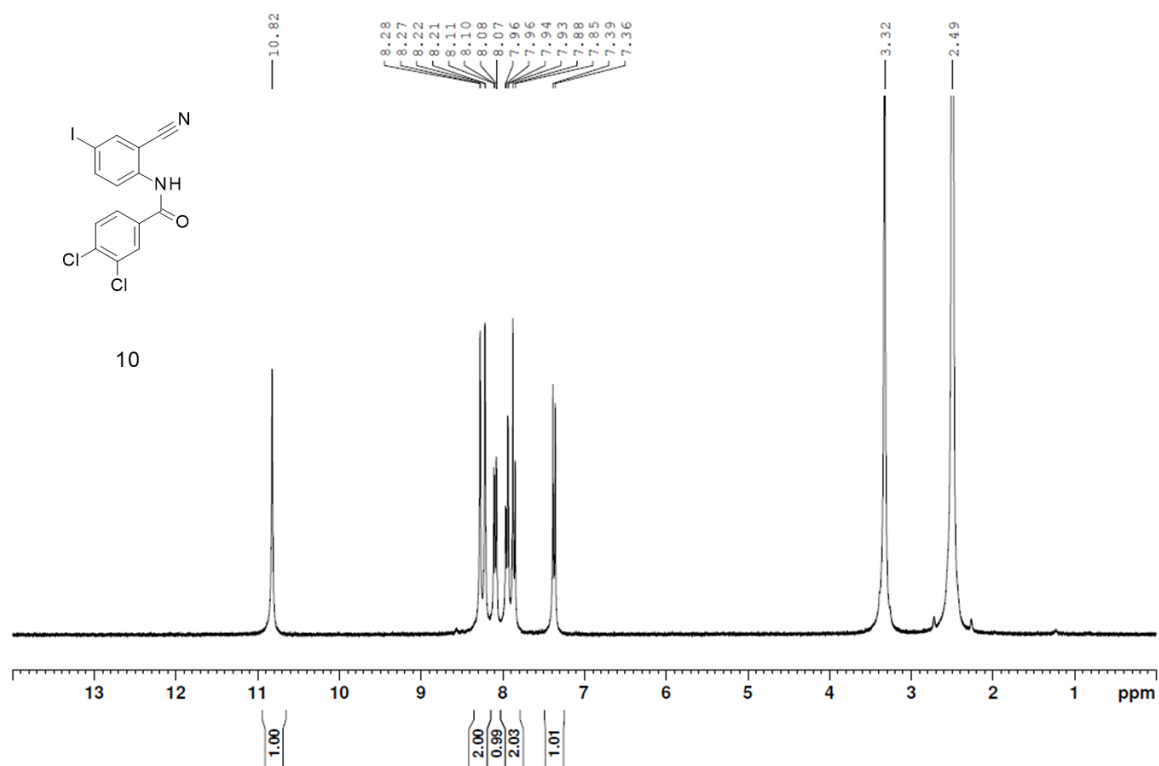

<sup>13</sup>C NMR of compound 10 (75 MHz, DMSO-d<sub>6</sub>)

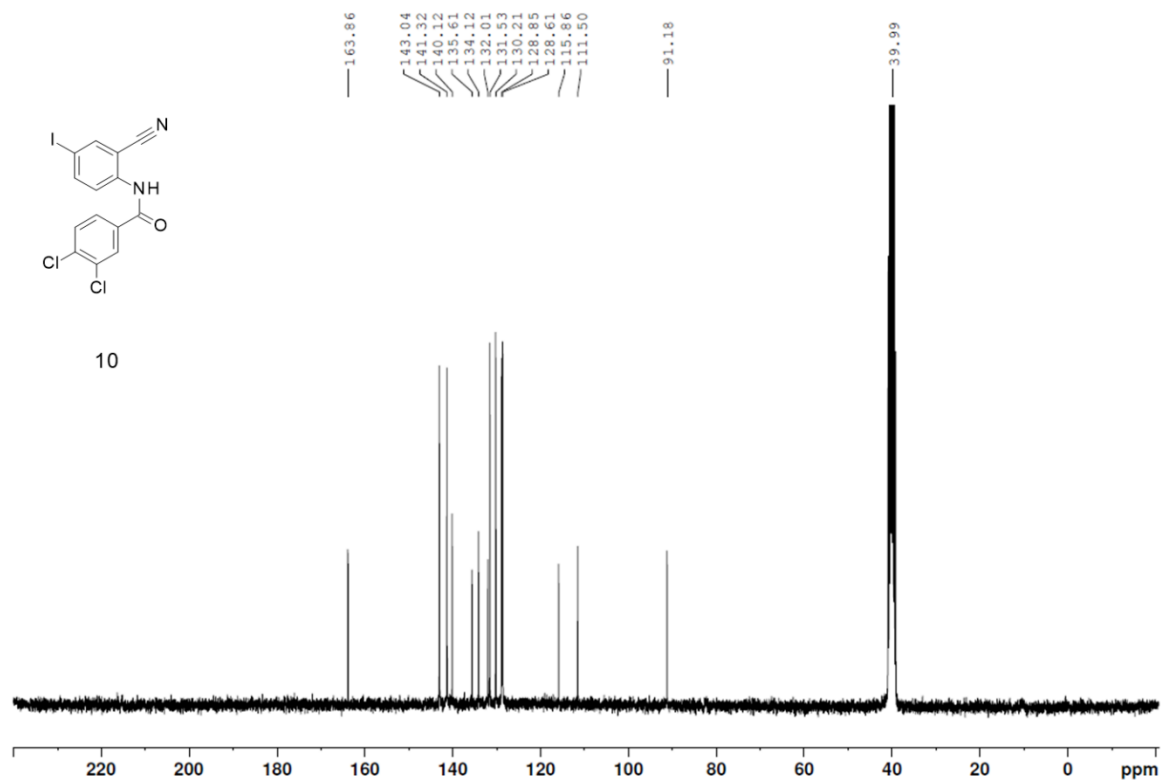

Figure S19: <sup>1</sup>H NMR and <sup>13</sup>C NMR spectra of compound 10

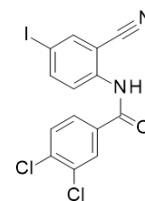

10

Page 1

## Elemental Composition Report

### Single Mass Analysis

Tolerance = 20.0 PPM / DBE: min = -1.5, max = 80.0

Element prediction: Off

Number of isotope peaks used for i-FIT = 2

Monoisotopic Mass, Even Electron Ions

603 formula(e) evaluated with 12 results within limits (up to 1 closest results for each mass)

Elements Used:

C: 6-40 H: 2-36 N: 0-4 O: 0-7 Cl: 1-3 I: 0-1

1: TOF MS ES-  
1.30e+005

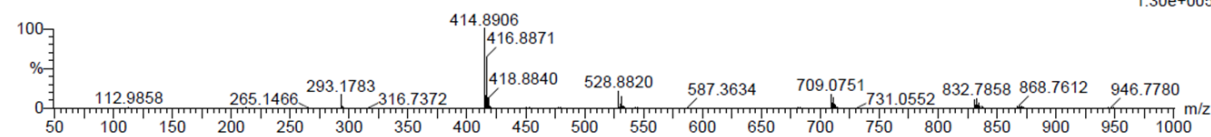

Minimum: -1.5  
Maximum: 10.0 20.0 80.0

| Mass     | Calc. Mass | mDa | PPM | DBE  | i-FIT | Formula           |
|----------|------------|-----|-----|------|-------|-------------------|
| 414.8906 | 414.8902   | 0.4 | 1.0 | 11.5 | 1.1   | C14 H6 N2 O Cl2 I |

Figure S20: HRMS spectrum of compound 10

<sup>1</sup>H NMR of compound 11 (300 MHz, DMSO-d<sub>6</sub>)

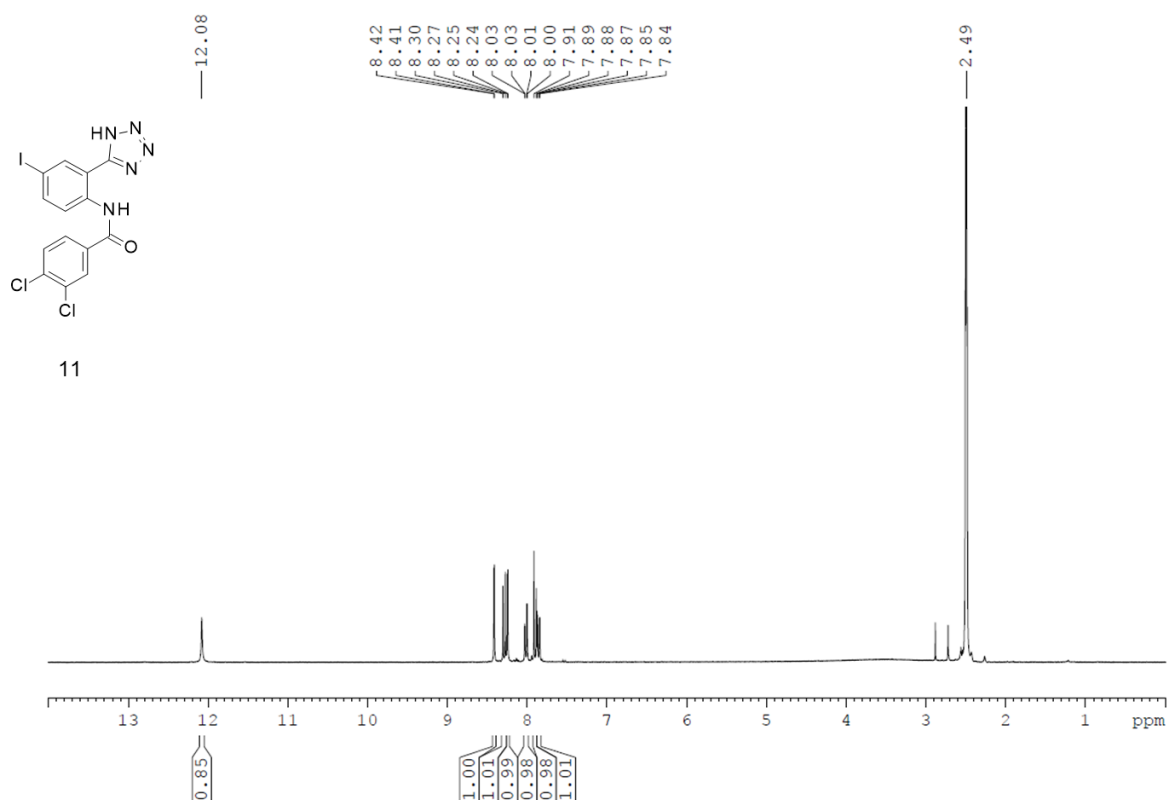

<sup>13</sup>C NMR of compound 11 (75 MHz, DMSO-d<sub>6</sub>)

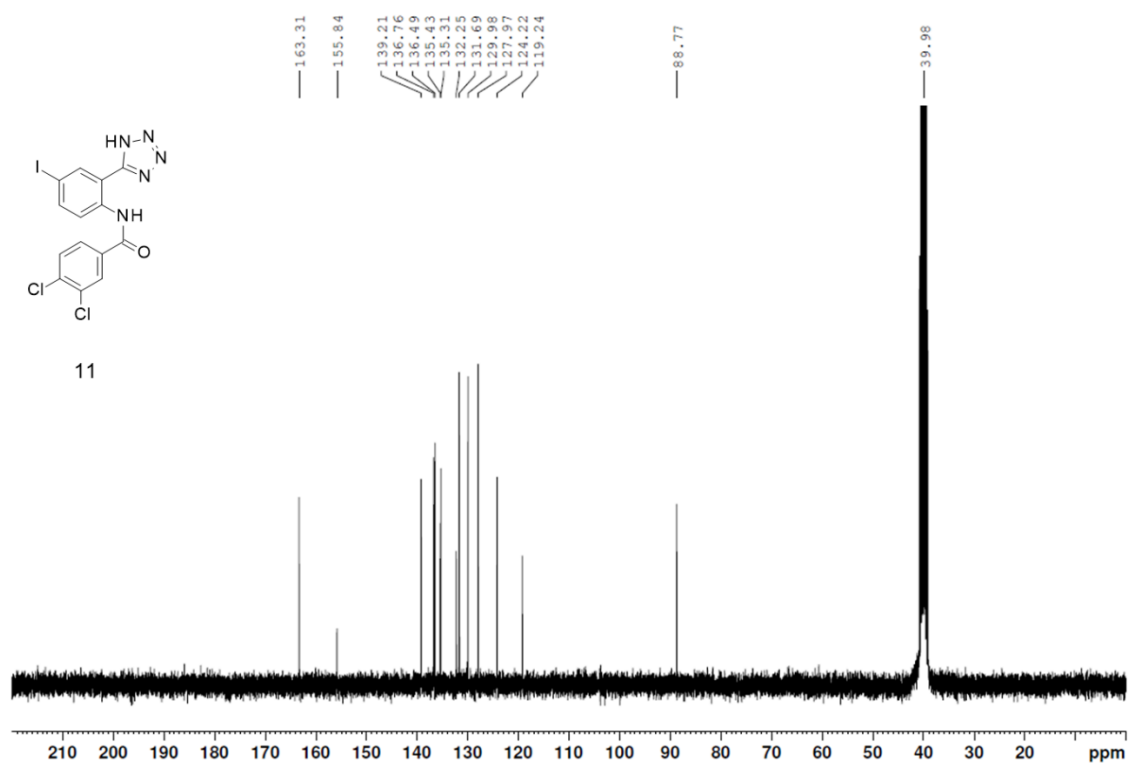

Figure S21: <sup>1</sup>H NMR and <sup>13</sup>C NMR spectra of compound 11

## Elemental Composition Report

### Single Mass Analysis

Tolerance = 20.0 PPM / DBE: min = -1.5, max = 80.0

Element prediction: Off

Number of isotope peaks used for i-FIT = 2

Monoisotopic Mass, Even Electron Ions

783 formula(e) evaluated with 17 results within limits (up to 1 closest results for each mass)

Elements Used:

C: 6-40 H: 2-36 N: 0-5 O: 0-7 Cl: 1-3 I: 0-1

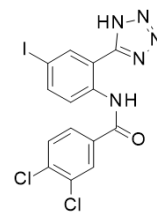

11

Page 1

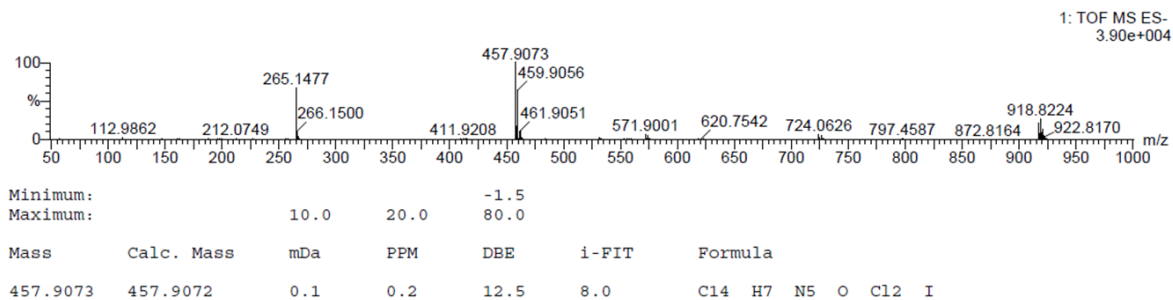

Figure S22: HRMS spectrum of compound 11

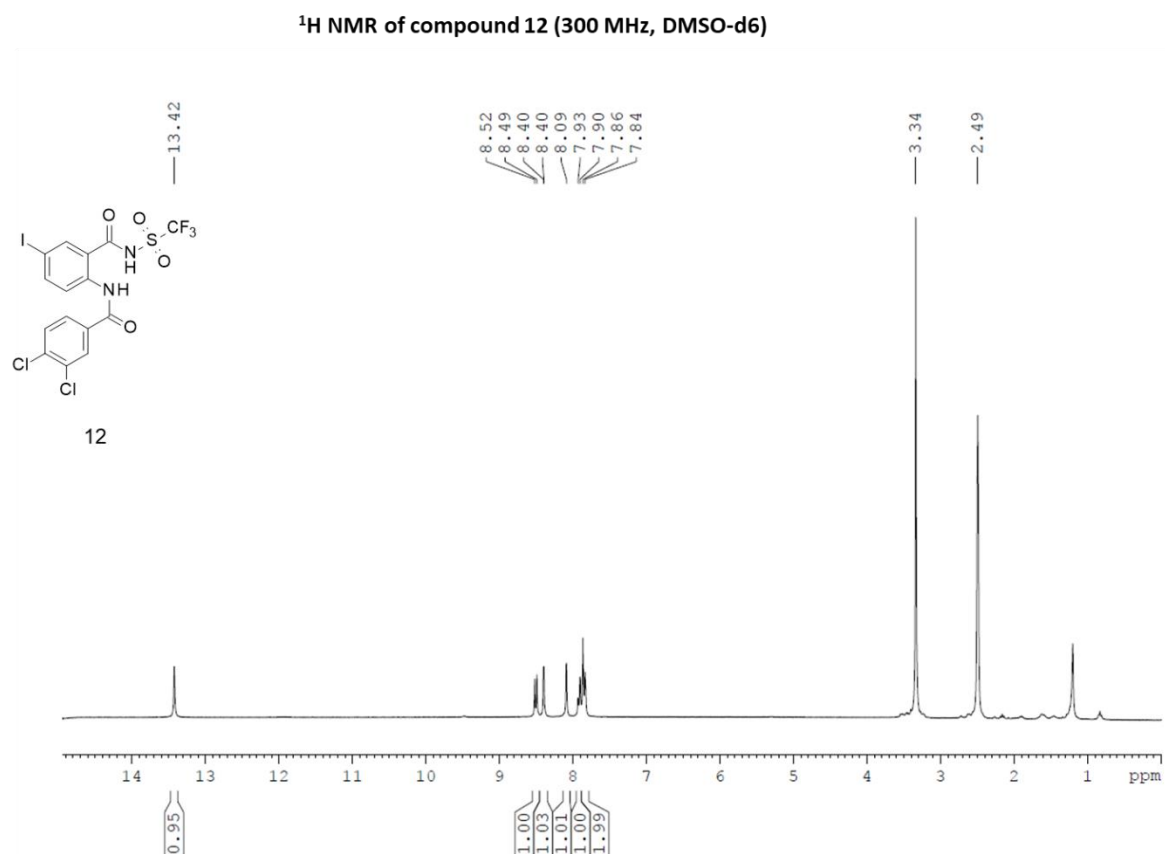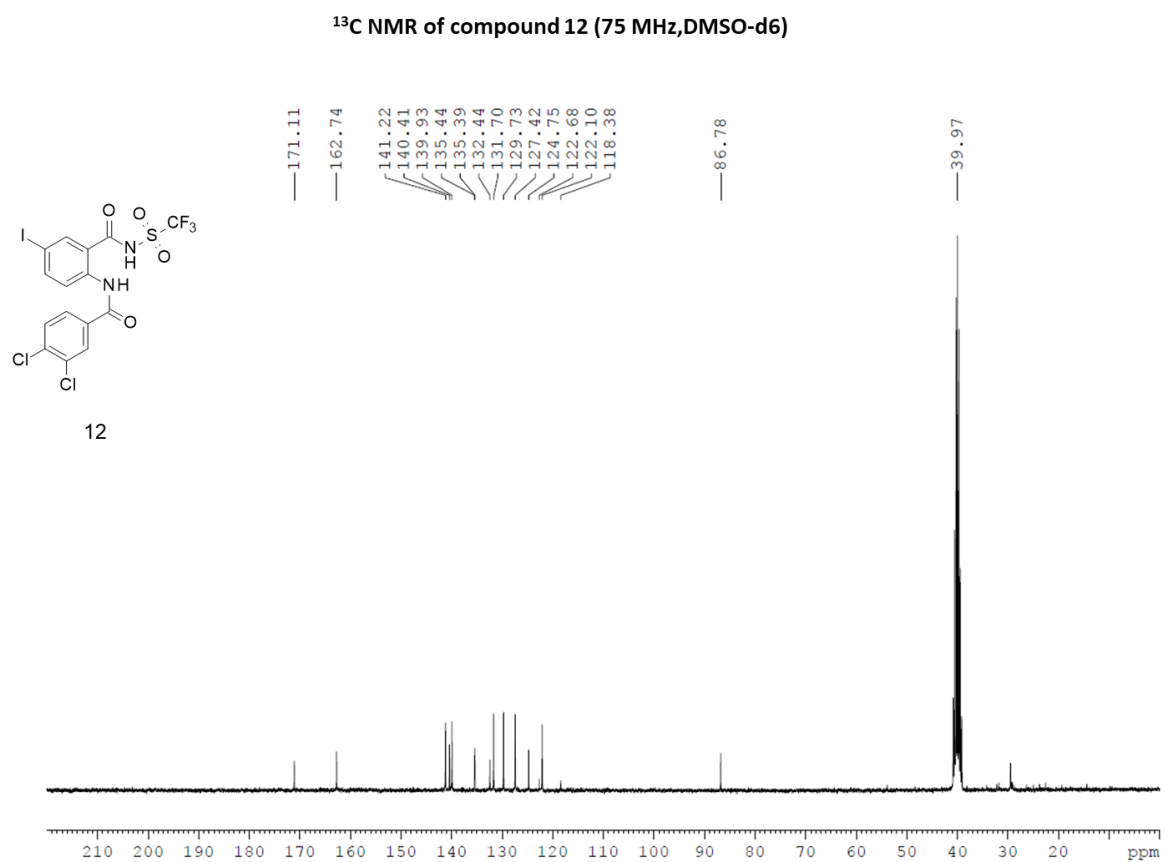

Figure S23: <sup>1</sup>H NMR and <sup>13</sup>C NMR spectra of compound 12



## Elemental Composition Report

### Single Mass Analysis

Tolerance = 10.0 PPM / DBE: min = -1.5, max = 50.0

Element prediction: Off

Number of isotope peaks used for i-FIT = 3

Monoisotopic Mass, Even Electron Ions

11796 formula(e) evaluated with 19 results within limits (up to 5 closest results for each mass)

Elements Used:

C: 15-15 H: 0-60 N: 0-10 O: 0-15 F: 1-3 S: 0-3 Cl: 0-2 I: 0-1

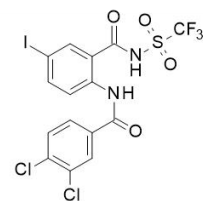

12

1: TOF MS ES-  
1.60e+005

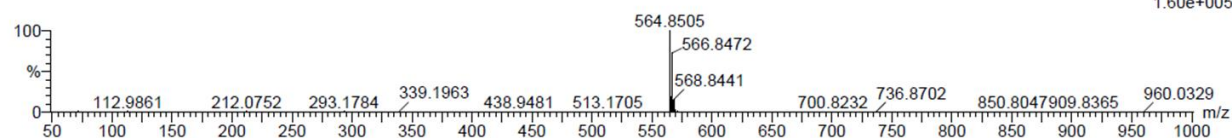

Minimum: -1.5  
Maximum: 50.0

| Mass     | Calc. Mass | mDa | PPM | DBE  | i-FIT | Formula                 |
|----------|------------|-----|-----|------|-------|-------------------------|
| 564.8505 | 564.8500   | 0.5 | 0.9 | 10.5 | 35.5  | C15 H7 N2 O4 F3 S Cl2 I |

Figure S24: HRMS spectrum of compound 12

<sup>1</sup>H NMR of compound 13 (300 MHz, DMSO-d<sub>6</sub>)

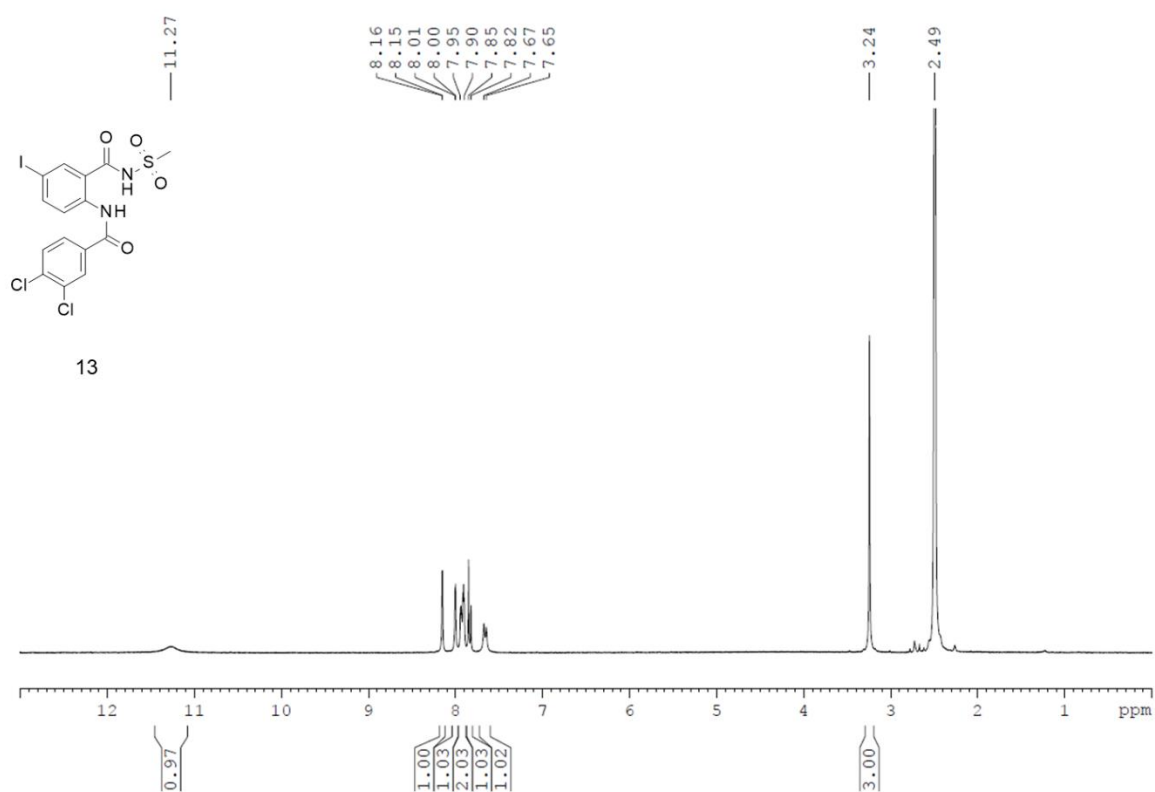

<sup>13</sup>C NMR of compound 13 (75 MHz, DMSO-d<sub>6</sub>)

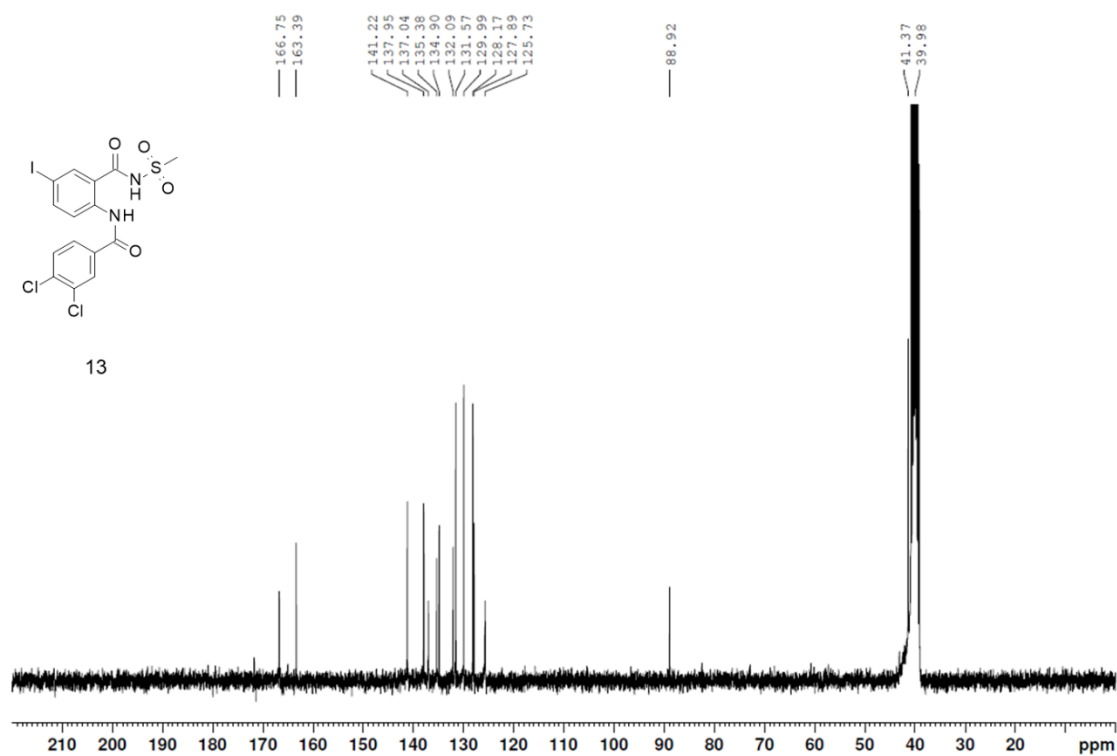

Figure S25: <sup>1</sup>H NMR and <sup>13</sup>C NMR spectra of compound 13

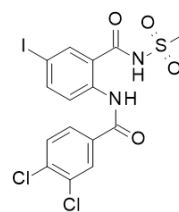

13

## Elemental Composition Report

Page 1

### Single Mass Analysis

Tolerance = 20.0 PPM / DBE: min = -1.5, max = 80.0

Element prediction: Off

Number of isotope peaks used for i-FIT = 2

Monoisotopic Mass, Even Electron Ions

1636 formula(e) evaluated with 30 results within limits (up to 1 best isotopic matches for each mass)

Elements Used:

C: 6-40 H: 2-36 N: 0-5 O: 0-7 S: 0-1 Cl: 1-3 I: 0-1

1: TOF MS ES-  
6.20e+003

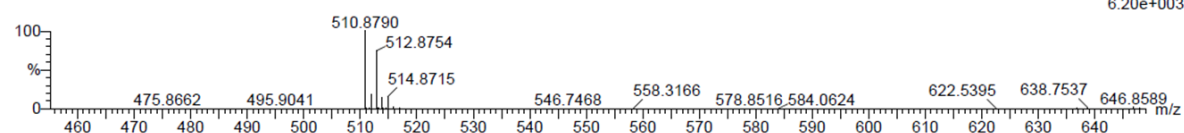

Minimum:

Maximum: 10.0 20.0 -1.5 80.0

| Mass     | Calc. Mass | mDa | PPM | DBE  | i-FIT | Formula               |
|----------|------------|-----|-----|------|-------|-----------------------|
| 510.8790 | 510.8783   | 0.7 | 1.4 | 10.5 | 0.2   | C15 H10 N2 O4 S Cl2 I |

Figure S26: HRMS spectrum of compound 13

<sup>1</sup>H NMR of compound 14 (300 MHz, DMSO-d<sub>6</sub>)

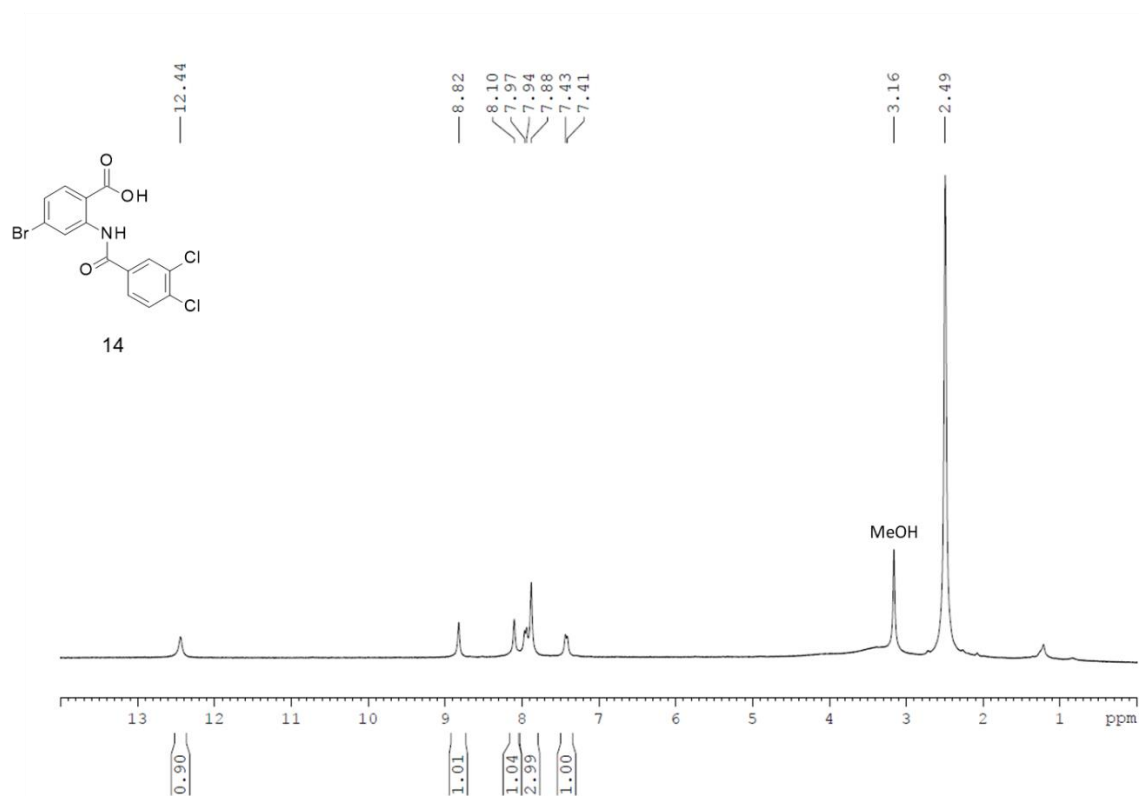

<sup>13</sup>C JMOD NMR of compound 14 (75 MHz, DMSO-d<sub>6</sub>)

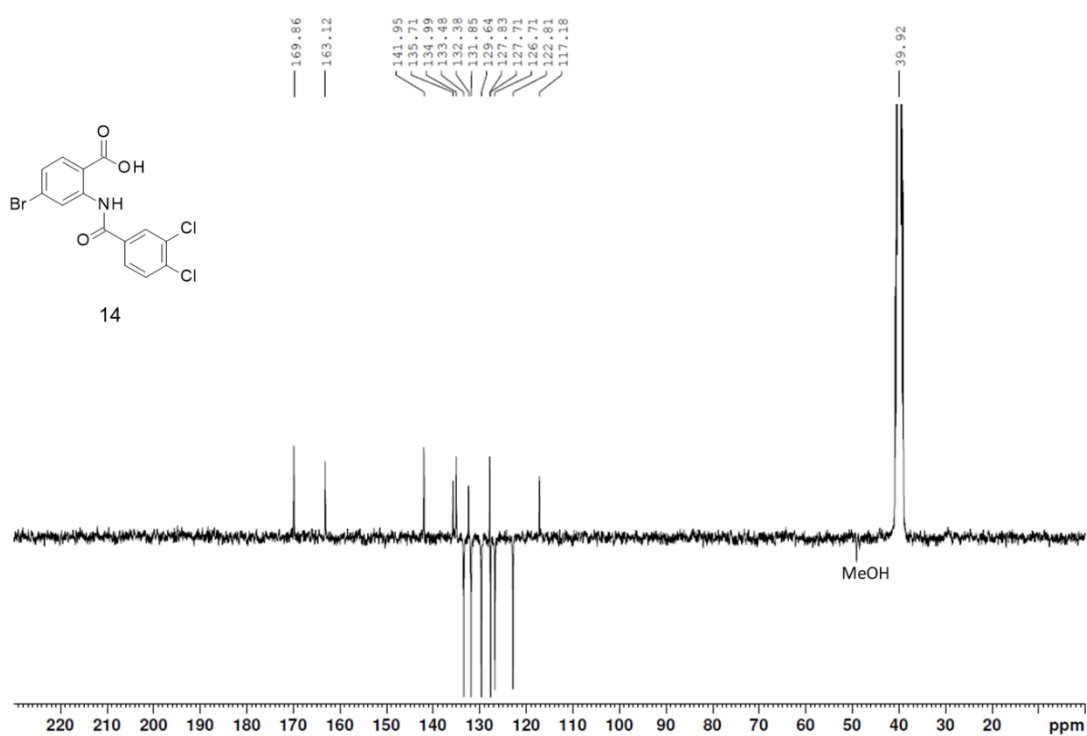

Figure S27: <sup>1</sup>H NMR and <sup>13</sup>C NMR spectra of compound 14

## Elemental Composition Report

Page 1

### Single Mass Analysis

Tolerance = 10.0 PPM / DBE: min = -1.5, max = 50.0

Element prediction: Off

Number of isotope peaks used for i-FIT = 3

Monoisotopic Mass, Even Electron Ions

2876 formula(e) evaluated with 6 results within limits (up to 5 closest results for each mass)

Elements Used:

C: 10-50 H: 0-60 N: 0-10 O: 0-15 Cl: 0-2 Br: 0-1 I: 0-1

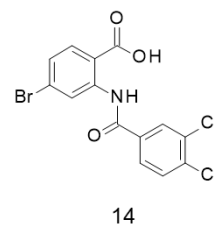

1: TOF MS ES-  
5.20e+003

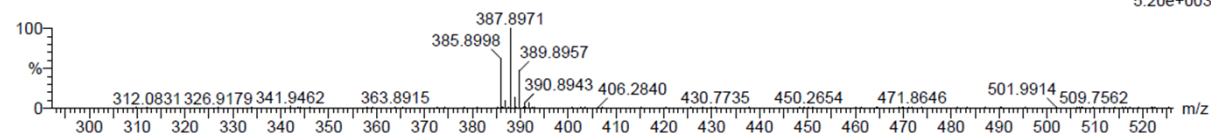

Minimum: -1.5  
Maximum: 50.0

| Mass     | Calc. Mass | mDa | PPM | DBE  | i-FIT | Formula            |
|----------|------------|-----|-----|------|-------|--------------------|
| 385.8998 | 385.8986   | 1.2 | 3.1 | 10.5 | 1.8   | C14 H7 N O3 Cl2 Br |

Figure S28: HRMS spectrum of compound 14

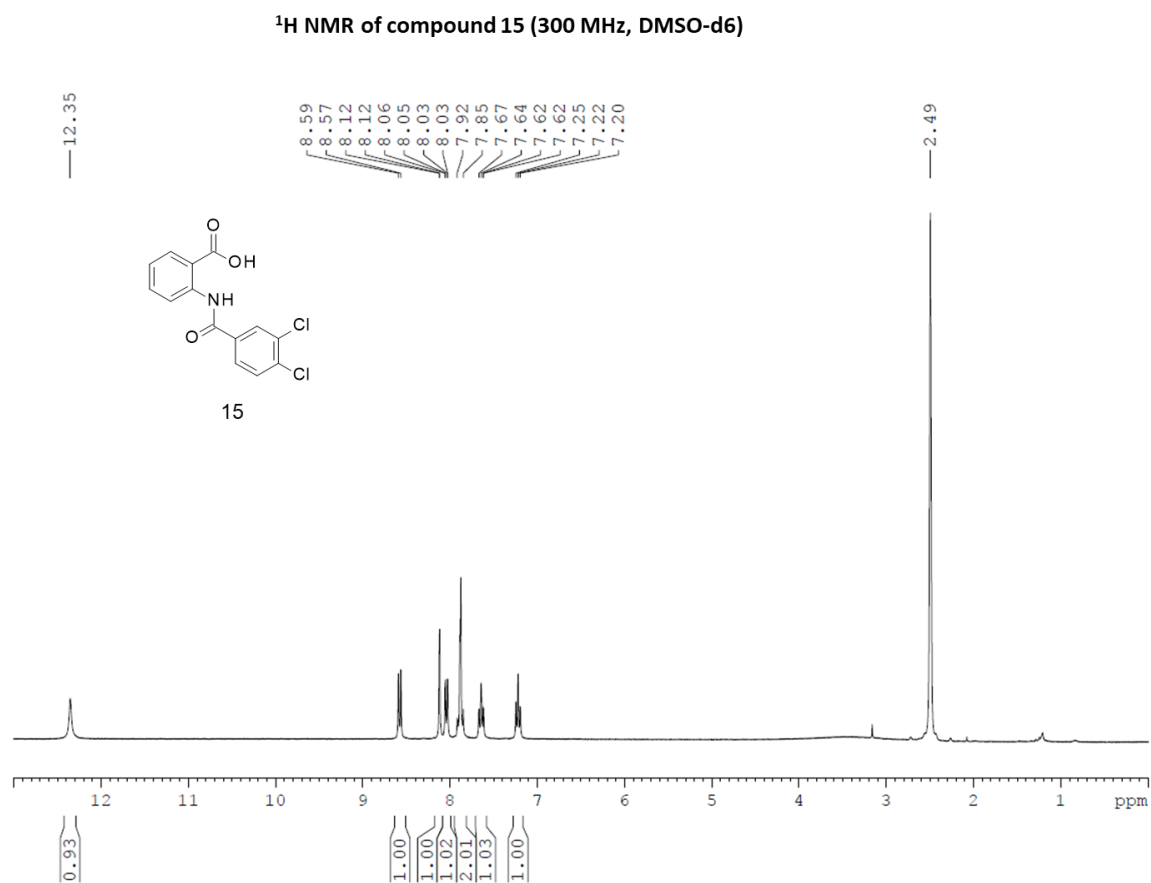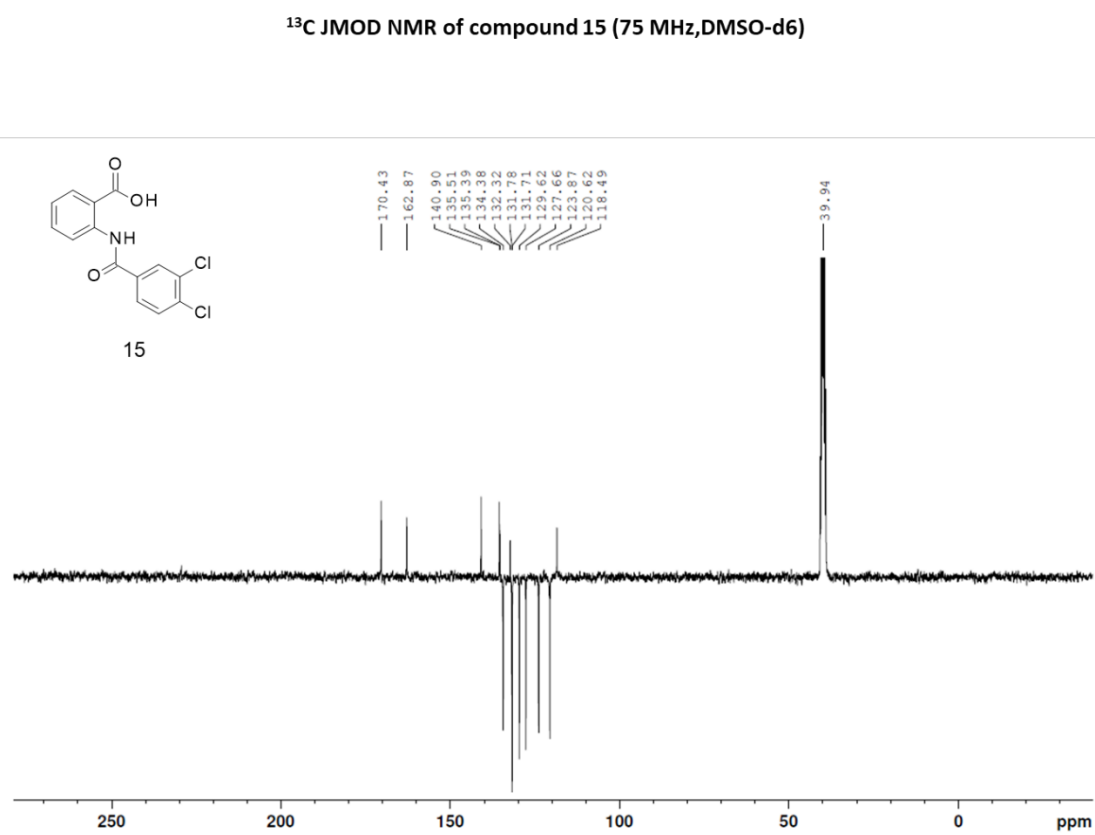

Figure S29: <sup>1</sup>H NMR and <sup>13</sup>C NMR spectra of compound 15

## Elemental Composition Report

### Single Mass Analysis

Tolerance = 20.0 PPM / DBE: min = -1.5, max = 50.0

Element prediction: Off

Number of isotope peaks used for i-FIT = 2

Monoisotopic Mass, Even Electron Ions

343 formula(e) evaluated with 5 results within limits (up to 1 best isotopic matches for each mass)

Elements Used:

C: 2-20 H: 2-36 N: 0-5 O: 0-7 Cl: 1-2 I: 0-1

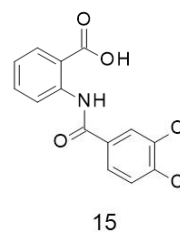

Page 1

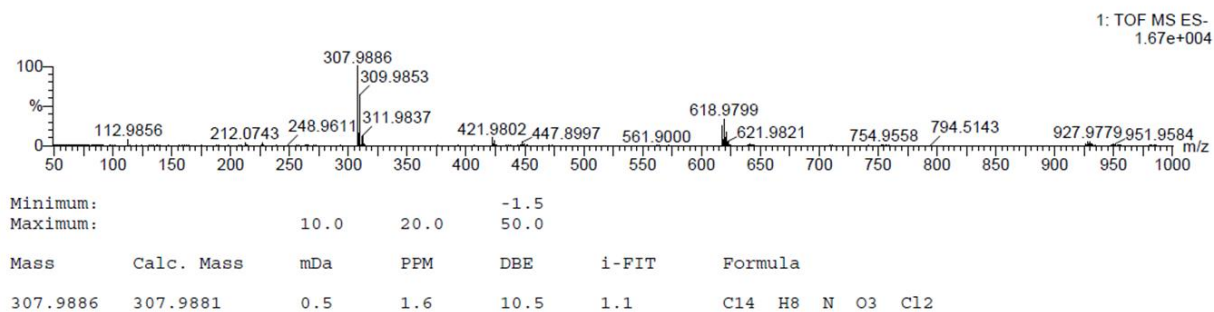

Figure S30: HRMS spectrum of compound 15

<sup>1</sup>H NMR of compound 16 (300 MHz, DMSO-d<sub>6</sub>)

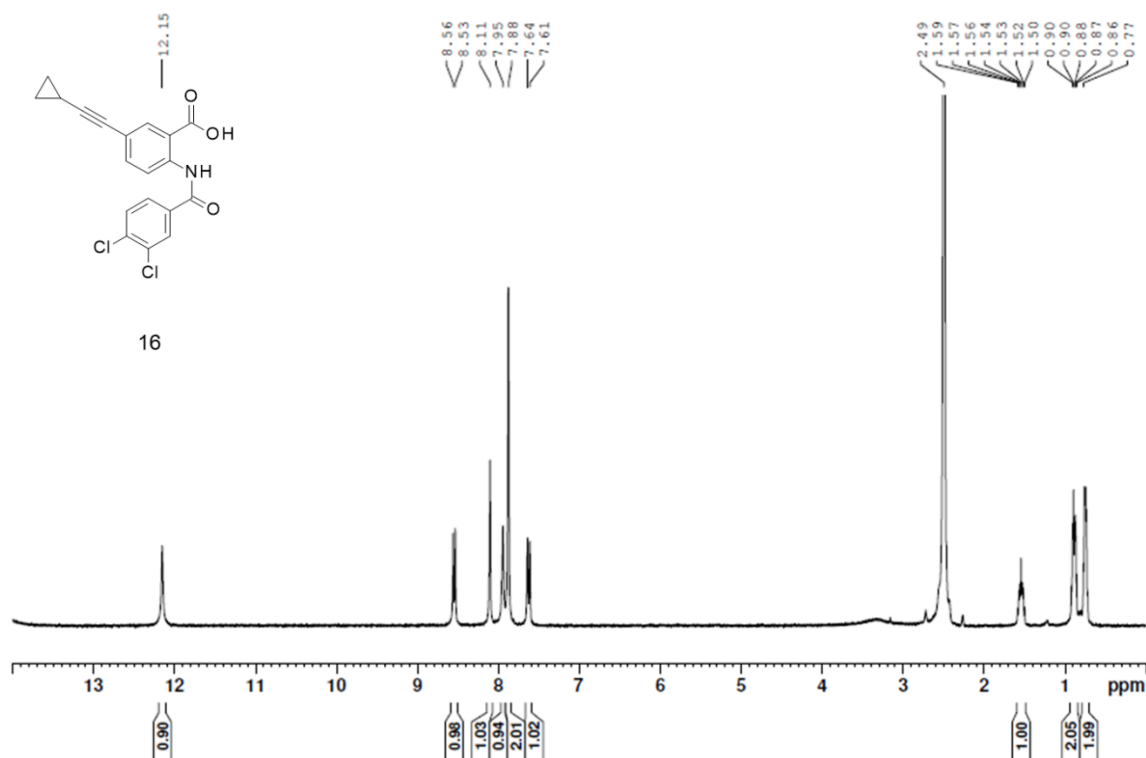

<sup>13</sup>C NMR of compound 16 (75 MHz, DMSO-d<sub>6</sub>)

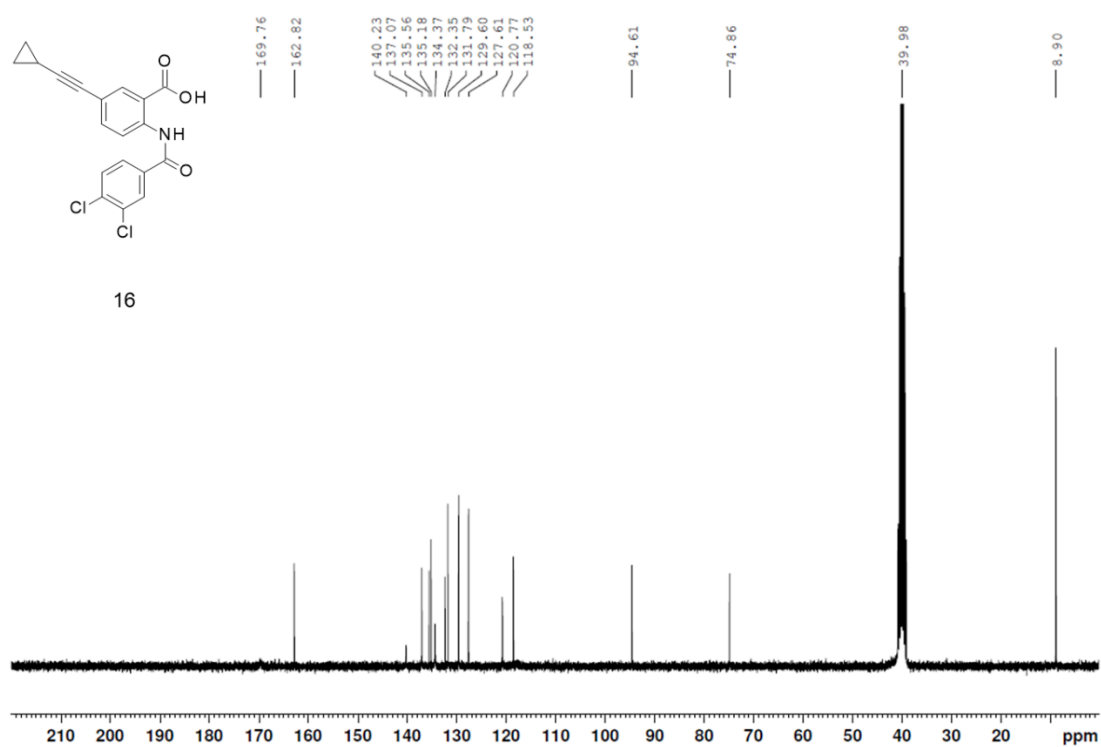

Figure S31: <sup>1</sup>H NMR and <sup>13</sup>C NMR spectra of compound 16



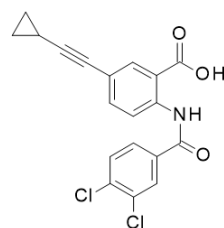

16

## Elemental Composition Report

### Single Mass Analysis

Tolerance = 20.0 PPM / DBE: min = -1.5, max = 50.0

Element prediction: Off

Number of isotope peaks used for i-FIT = 2

Monoisotopic Mass, Even Electron Ions

221 formula(e) evaluated with 5 results within limits (up to 1 best isotopic matches for each mass)

Elements Used:

C: 2-20 H: 2-36 N: 0-5 O: 0-7 Cl: 1-2

1: TOF MS ES-  
9.01e+003

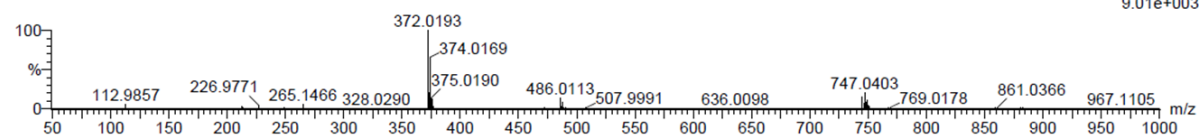

Minimum: -1.5  
Maximum: 10.0 20.0 50.0

| Mass     | Calc. Mass | mDa  | PPM  | DBE  | i-FIT | Formula          |
|----------|------------|------|------|------|-------|------------------|
| 372.0193 | 372.0194   | -0.1 | -0.3 | 13.5 | 1.1   | C19 H12 N O3 Cl2 |

Figure S32: HRMS spectrum of compound 16

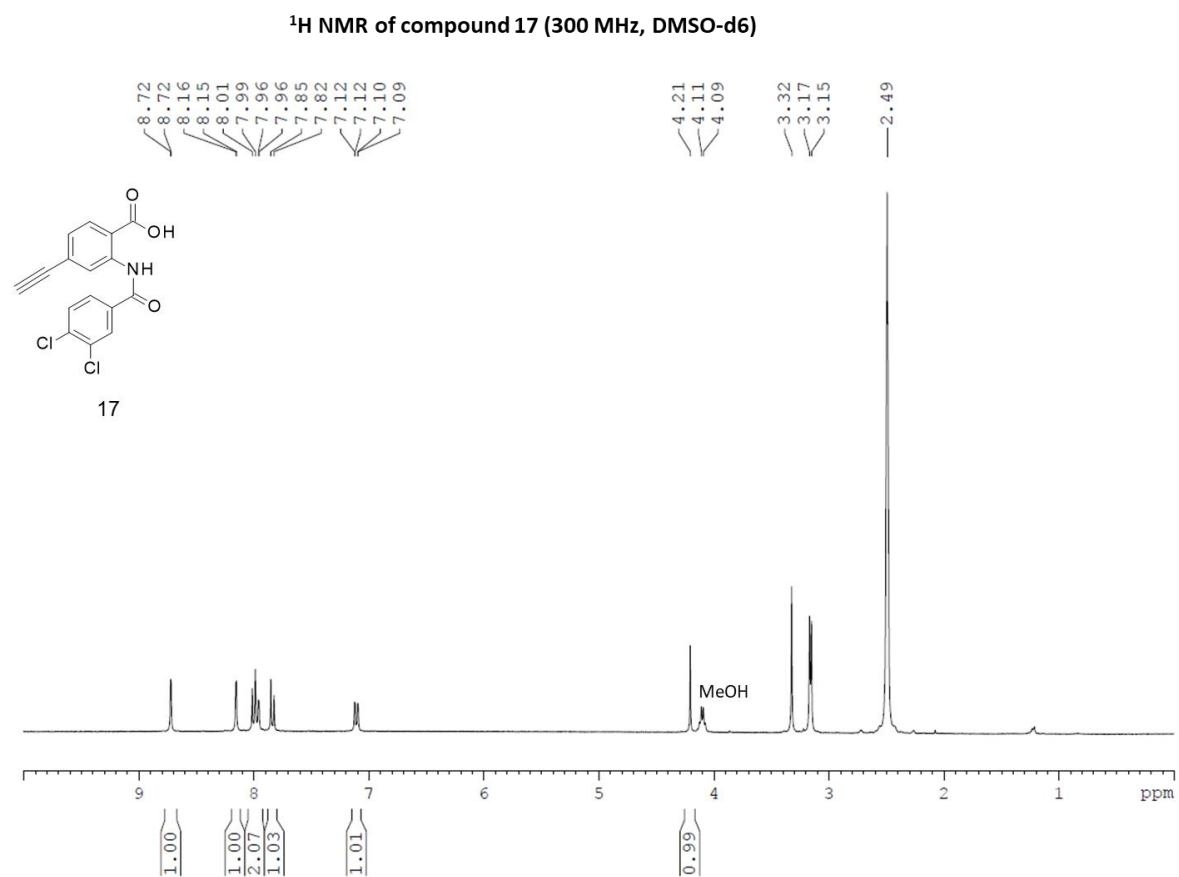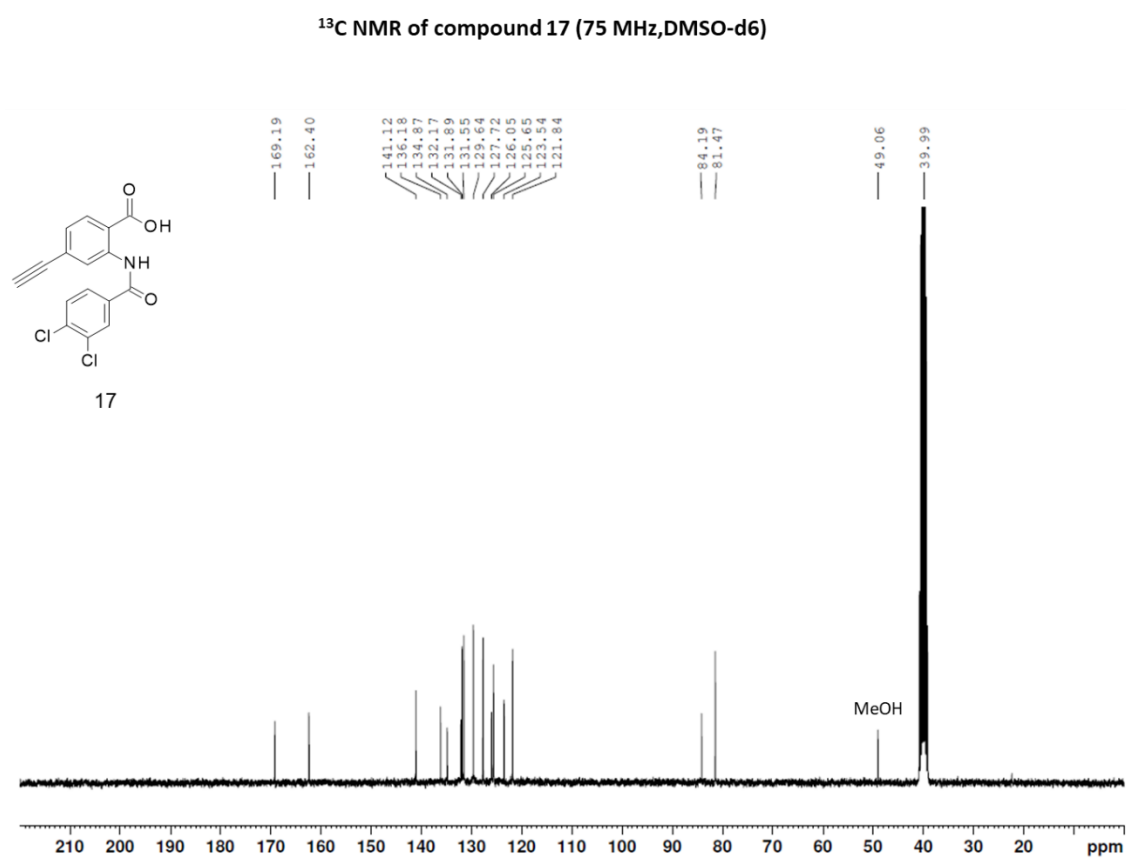

Figure S33: <sup>1</sup>H NMR and <sup>13</sup>C NMR spectra of compound 17

## Elemental Composition Report

Page 1

### Single Mass Analysis

Tolerance = 100.0 mDa / DBE: min = -1.5, max = 500.0

Element prediction: Off

Number of isotope peaks used for i-FIT = 3

Monoisotopic Mass, Even Electron Ions

350 formula(e) evaluated with 59 results within limits (up to 10 best isotopic matches for each mass)

Elements Used:

C: 0-30 H: 0-40 N: 0-4 O: 0-6 Cl: 0-2

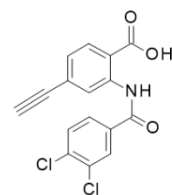

17

1: TOF MS ES-  
4.88e+004

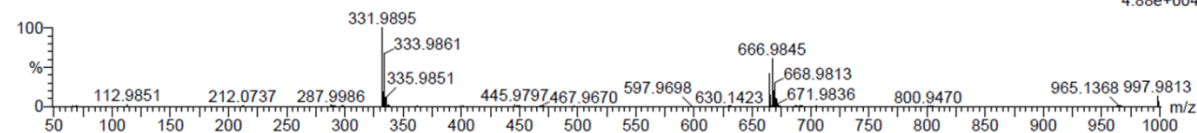

Minimum:

Maximum: 100.0 5.0 -1.5 500.0

| Mass     | Calc. Mass | mDa | PPM | DBE  | i-FIT | Formula         |
|----------|------------|-----|-----|------|-------|-----------------|
| 331.9895 | 331.9881   | 1.4 | 4.2 | 12.5 | 9.8   | C16 H8 N O3 Cl2 |

Figure S34: HRMS spectrum of compound 17

<sup>1</sup>H NMR of compound 18 (300 MHz, DMSO-d6)

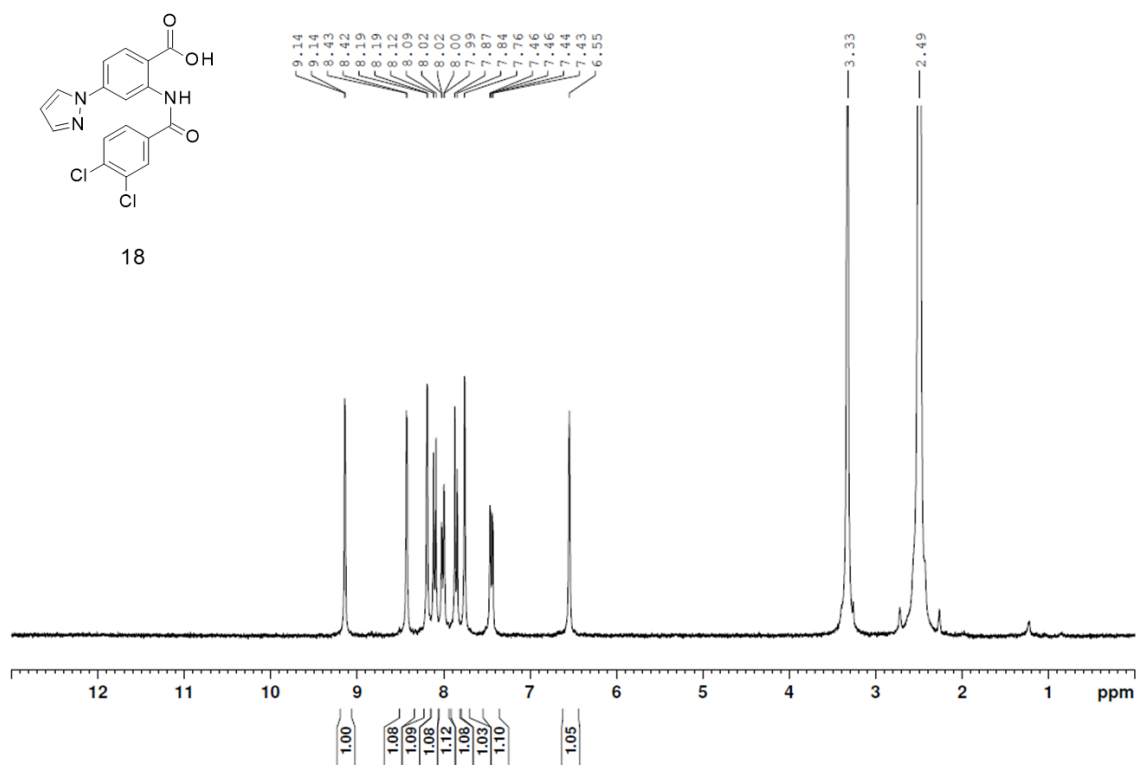

<sup>13</sup>C JMOD NMR of compound 18 (75 MHz, DMSO-d6)

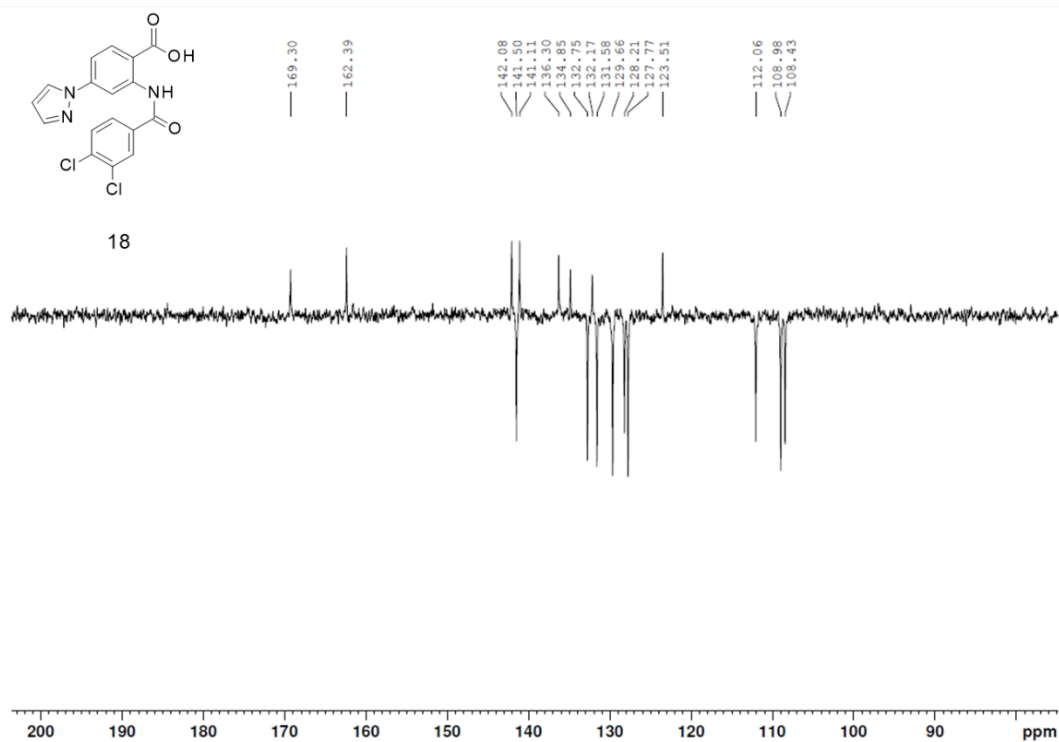

Figure S35: <sup>1</sup>H NMR and <sup>13</sup>C NMR spectra of compound 18

## Elemental Composition Report

### Single Mass Analysis

Tolerance = 10.0 PPM / DBE: min = -1.5, max = 50.0

Element prediction: Off

Number of isotope peaks used for i-FIT = 3

Monoisotopic Mass, Even Electron Ions

2596 formula(e) evaluated with 22 results within limits (up to 5 closest results for each mass)

Elements Used:

C: 10-50 H: 0-60 N: 0-10 O: 0-15 Cl: 0-2 Br: 0-1 I: 0-1

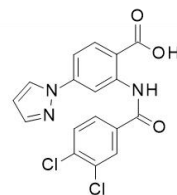

18

Page 1

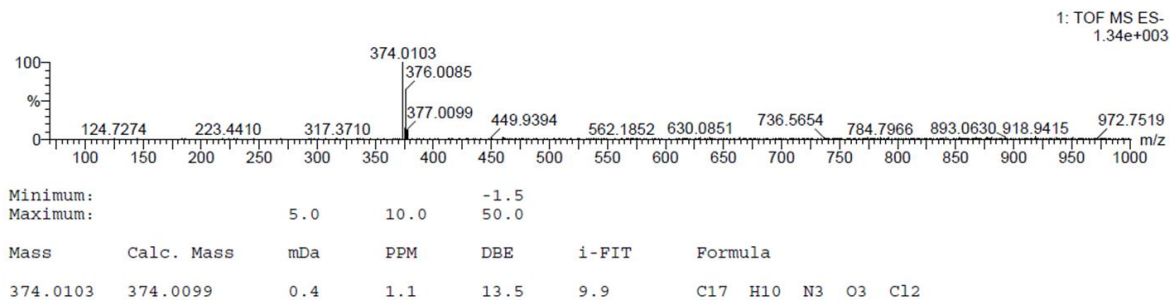

Figure S36: HRMS spectrum of compound 18

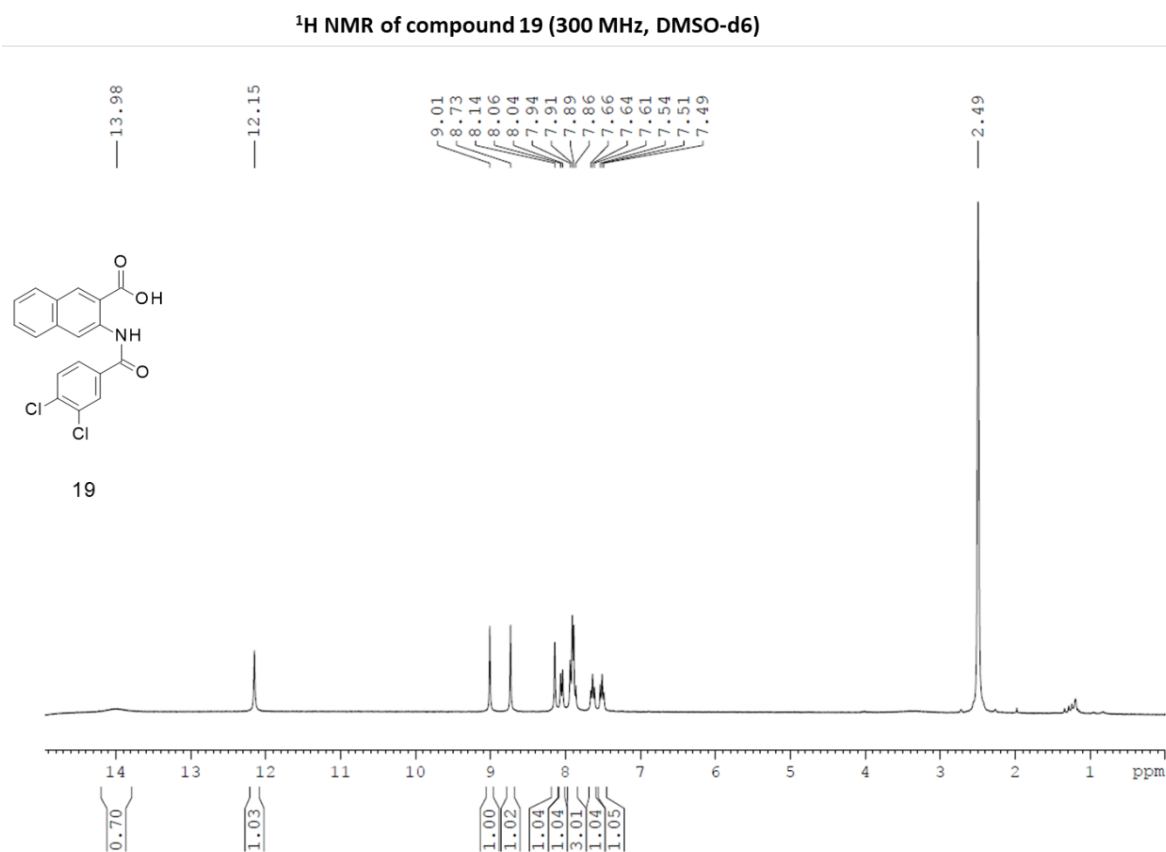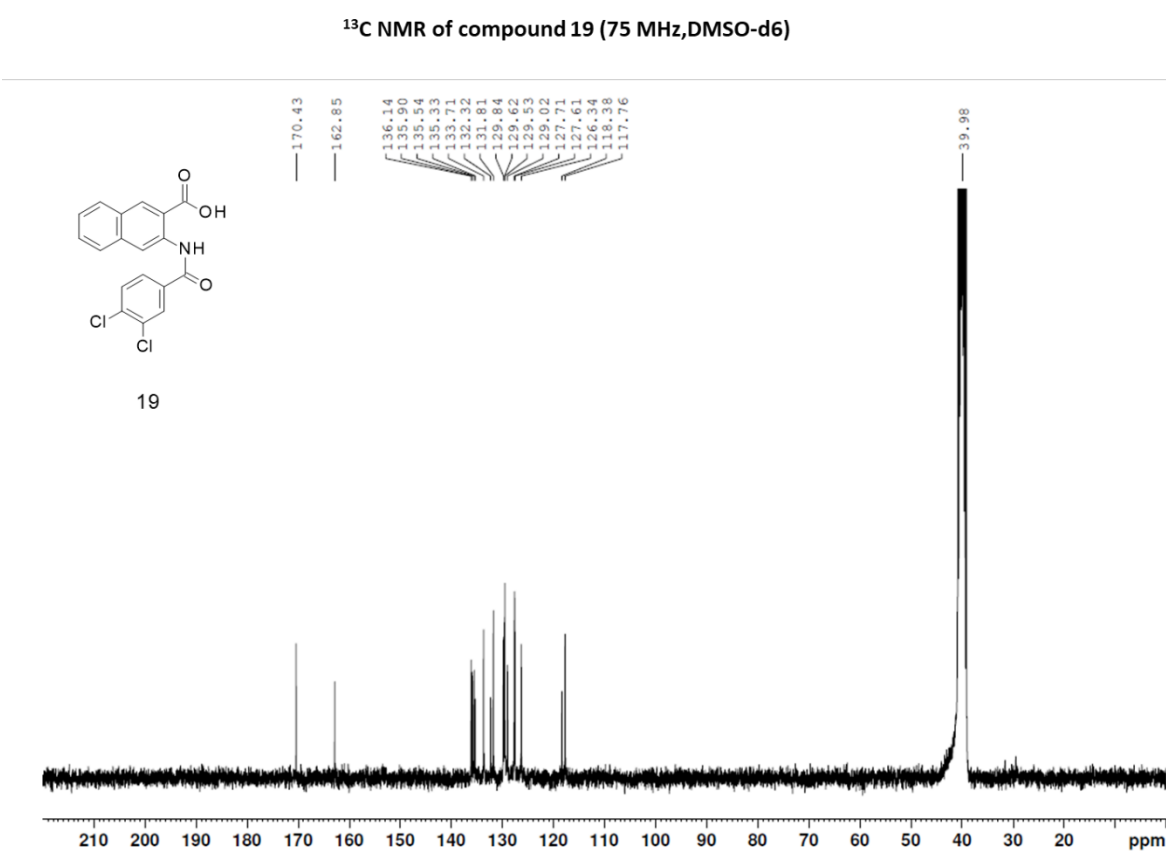

Figure S37: <sup>1</sup>H NMR and <sup>13</sup>C NMR spectra of compound 19

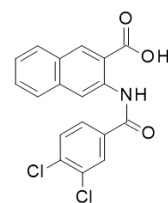

19

## Elemental Composition Report

### Single Mass Analysis

Tolerance = 100.0 mDa / DBE: min = -1.5, max = 500.0

Element prediction: Off

Number of isotope peaks used for i-FIT = 3

Monoisotopic Mass, Even Electron Ions

360 formula(e) evaluated with 67 results within limits (up to 10 best isotopic matches for each mass)

Elements Used:

C: 0-30 H: 0-40 N: 0-4 O: 0-6 Cl: 0-2

1: TOF MS ES-  
5.31e+004

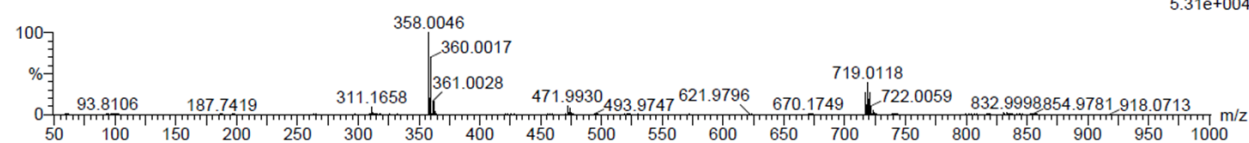

Minimum: -1.5  
Maximum: 100.0 5.0 500.0

| Mass     | Calc. Mass | mDa | PPM | DBE  | i-FIT | Formula          |
|----------|------------|-----|-----|------|-------|------------------|
| 358.0046 | 358.0038   | 0.8 | 2.2 | 13.5 | 54.2  | C18 H10 N O3 Cl2 |

Figure S38: HRMS spectrum of compound 19

<sup>1</sup>H NMR of compound 20 (300 MHz, DMSO-d6)

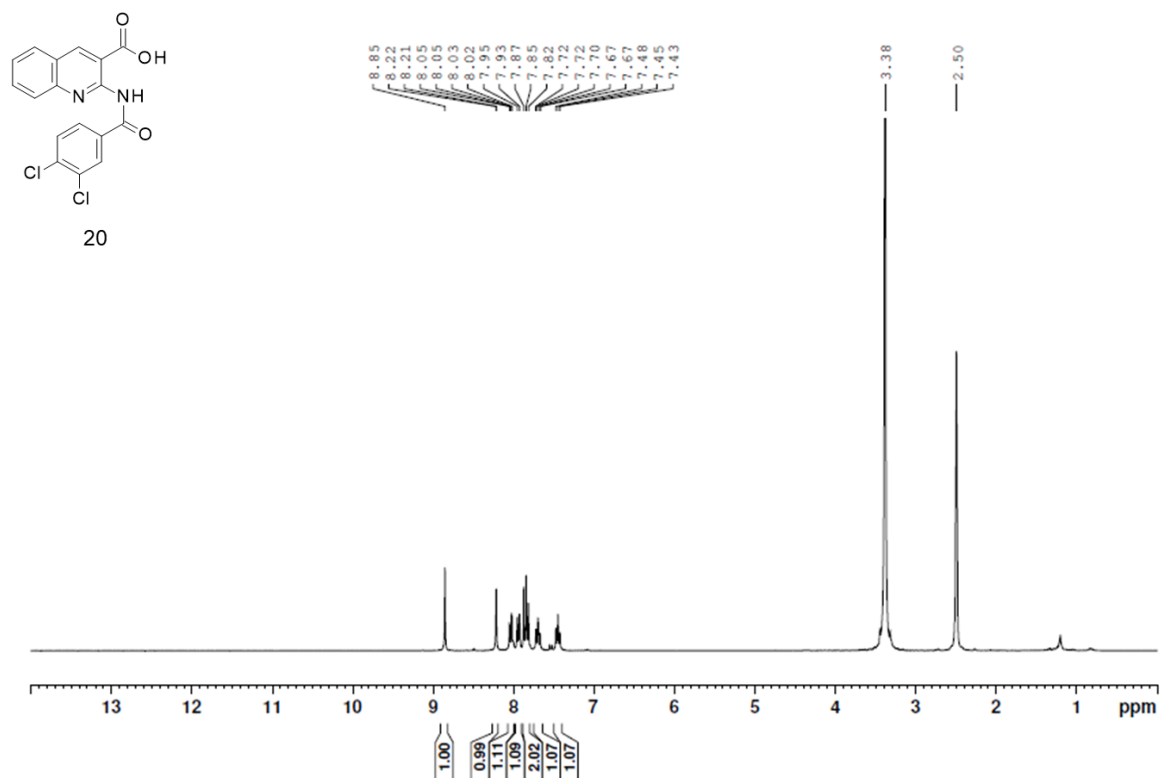

<sup>13</sup>C NMR of compound 20 (75 MHz, DMSO-d6)

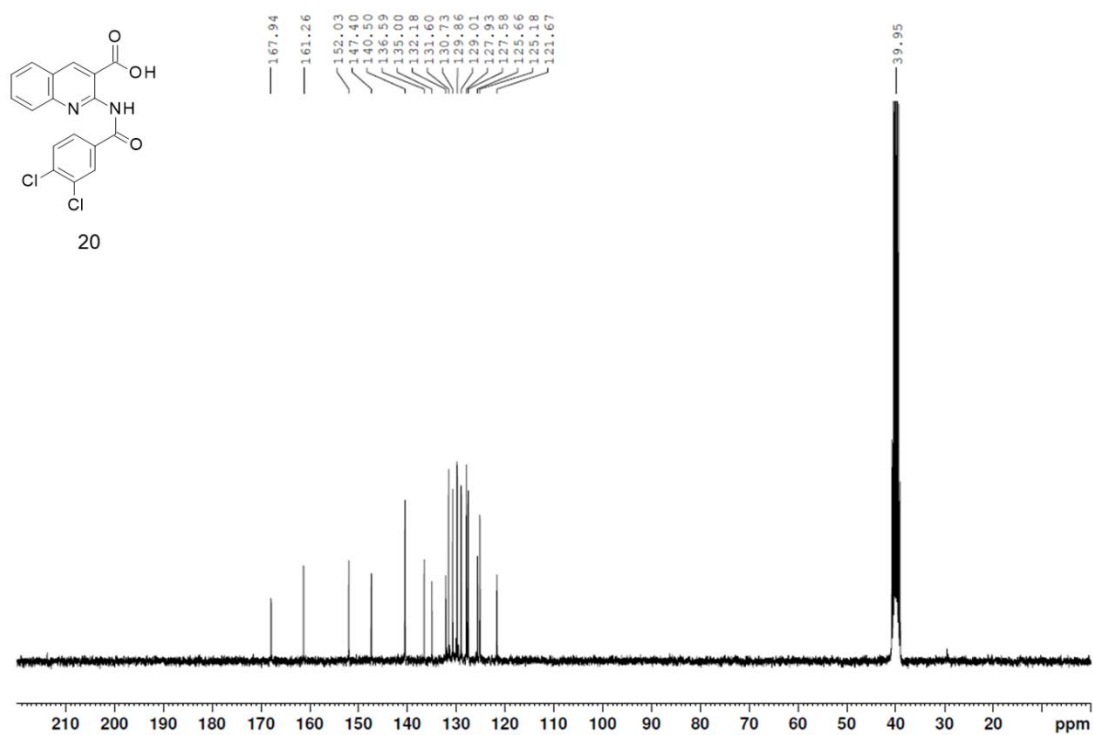

Figure S39: <sup>1</sup>H NMR and <sup>13</sup>C NMR spectra of compound 20



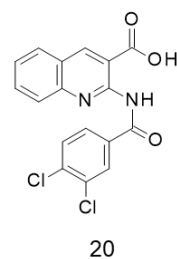

# Elemental Composition Report

## Single Mass Analysis

Tolerance = 20.0 PPM / DBE: min = -1.5, max = 50.0

Element prediction: Off

Number of isotope peaks used for i-FIT = 2

Monoisotopic Mass, Even Electron Ions

403 formula(e) evaluated with 6 results within limits (up to 1 best isotopic matches for each mass)

Elements Used:

C: 2-20 H: 2-36 N: 0-5 O: 0-7 Cl: 1-2 I: 0-1

1: TOF MS ES-  
3.83e+003

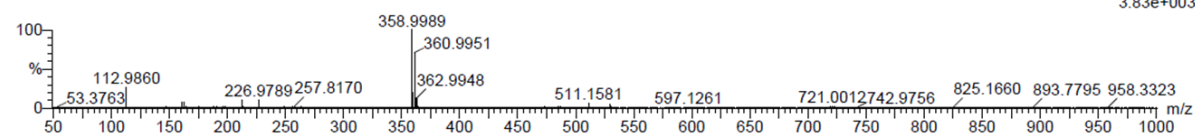

Minimum: -1.5  
Maximum: 10.0 20.0 50.0

| Mass     | Calc. Mass | mDa  | PPM  | DBE  | i-FIT | Formula          |
|----------|------------|------|------|------|-------|------------------|
| 358.9989 | 358.9990   | -0.1 | -0.3 | 13.5 | 0.0   | C17 H9 N2 O3 Cl2 |

Figure S40: HRMS spectrum of compound 20
